# Supplementary material for: An Optimal Control Framework for the Automated Design of Personalized Cancer Treatments
Source: PubMed Central journal article supplement (PMC7270334; doi:10.3389/fbioe.2020.00523), 2020-05-28
Supplement: Data_Sheet_1.pdf [file Data_Sheet_1.pdf]

# Supplementary Materials: An optimal control framework for the automated design of personalized cancer treatments

## 1 OPTIMAL SCHEDULE

Analogously, we can optimize also the schedule of administration  $(t_0^*, t_1^*, \dots, t_n^*)$  with a new pulse  $u_2(t)$ . So we can introduce a new pulse  $T(t) = u_2(t)$  and using a similar integral structure as before:

$$\begin{aligned}
 t_0^* &= t_0 \\
 t_1^* &= t_0^* + \int_{t_0}^{t_1} dt' \tilde{T}(t') \\
 &\vdots \\
 t_j^* &= t_{j-1}^* + \int_{t_{j-1}}^{t_j} dt' \tilde{T}(t') \\
 &\vdots \\
 t_n^* &= t_{n-1}^* + \int_{t_{n-1}}^{t_n} dt' \tilde{T}(t') \\
 t_f^* &= t_n^* + \int_{t_n}^{t_f} dt' \tilde{T}(t') = t_f
 \end{aligned} \tag{S1}$$

where  $\tilde{T}(t)$  is the normalized function with respect to the difference between the initial time  $t_0$  and  $t_f$ , and is defined as follows:

$$\tilde{T}(t) = \frac{T(t)}{\int_{t_0}^{t_f} dt' T(t')} (t_0 - t_f) . \tag{S2}$$

So in this case the set of controls used are the set dosages  $D_i^*$  and the set  $t_i^*$  of times when drug is administered in Eq. (12) of the main text:  $\chi_{gi}(t) = f D_i(t_i) e^{-ka(t-t_i)}$ , as in the case presented in the main text it is necessary to fix *n a priori*.

Note that we here do not set any constrain about the minimum and the maximum time gap between two administrations. However, as drug holiday periods are supposed to be relevant for the health of the patient and for the success of a therapy, this aspect deserves further investigations (Castiglione and Piccoli (2007))

## 2 FIGURES

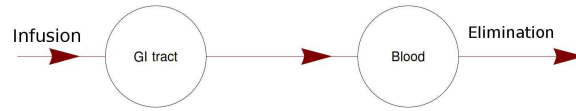

Figure S1: Diagram of compartmental PK for oral administration of Imatinib.

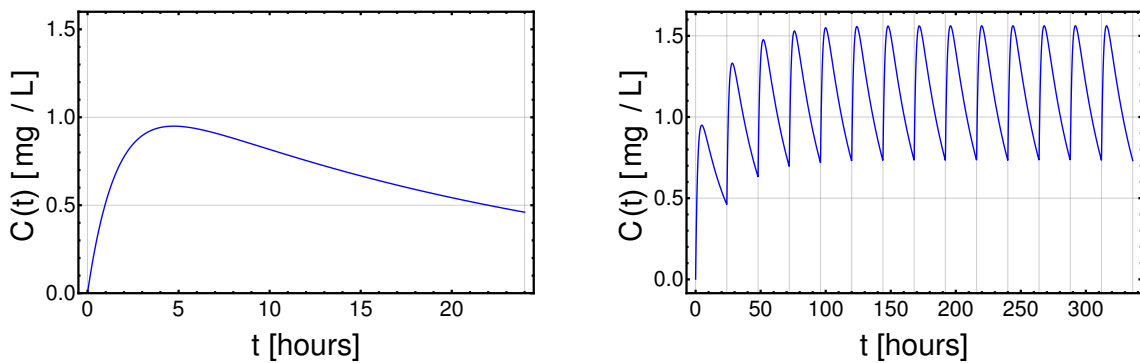

Figure S2: On the left is the simulation of the concentration in the blood  $C(t)$  of a single oral administration of 400mg of Imatinib. On the right there is a simulation of a multi-dose administration of 400mg of Imatinib, the drug is taken every 24 hours. Parameters of these simulation are presented in table S1

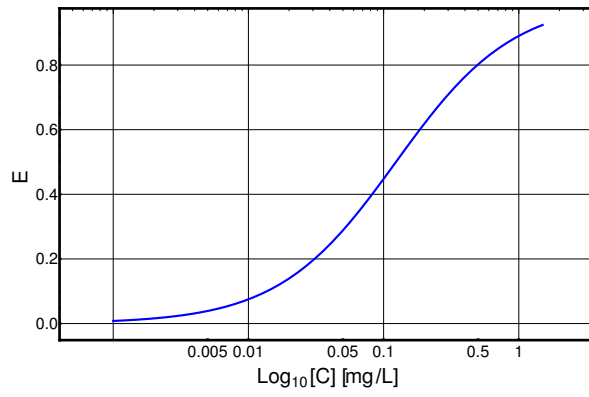

Figure S3: Curve of efficacy given by Eq. (9), we impose  $n = 1$ ,  $EC_{50} = 0.123$  [mg/L] and  $E_{max} = 1$ .

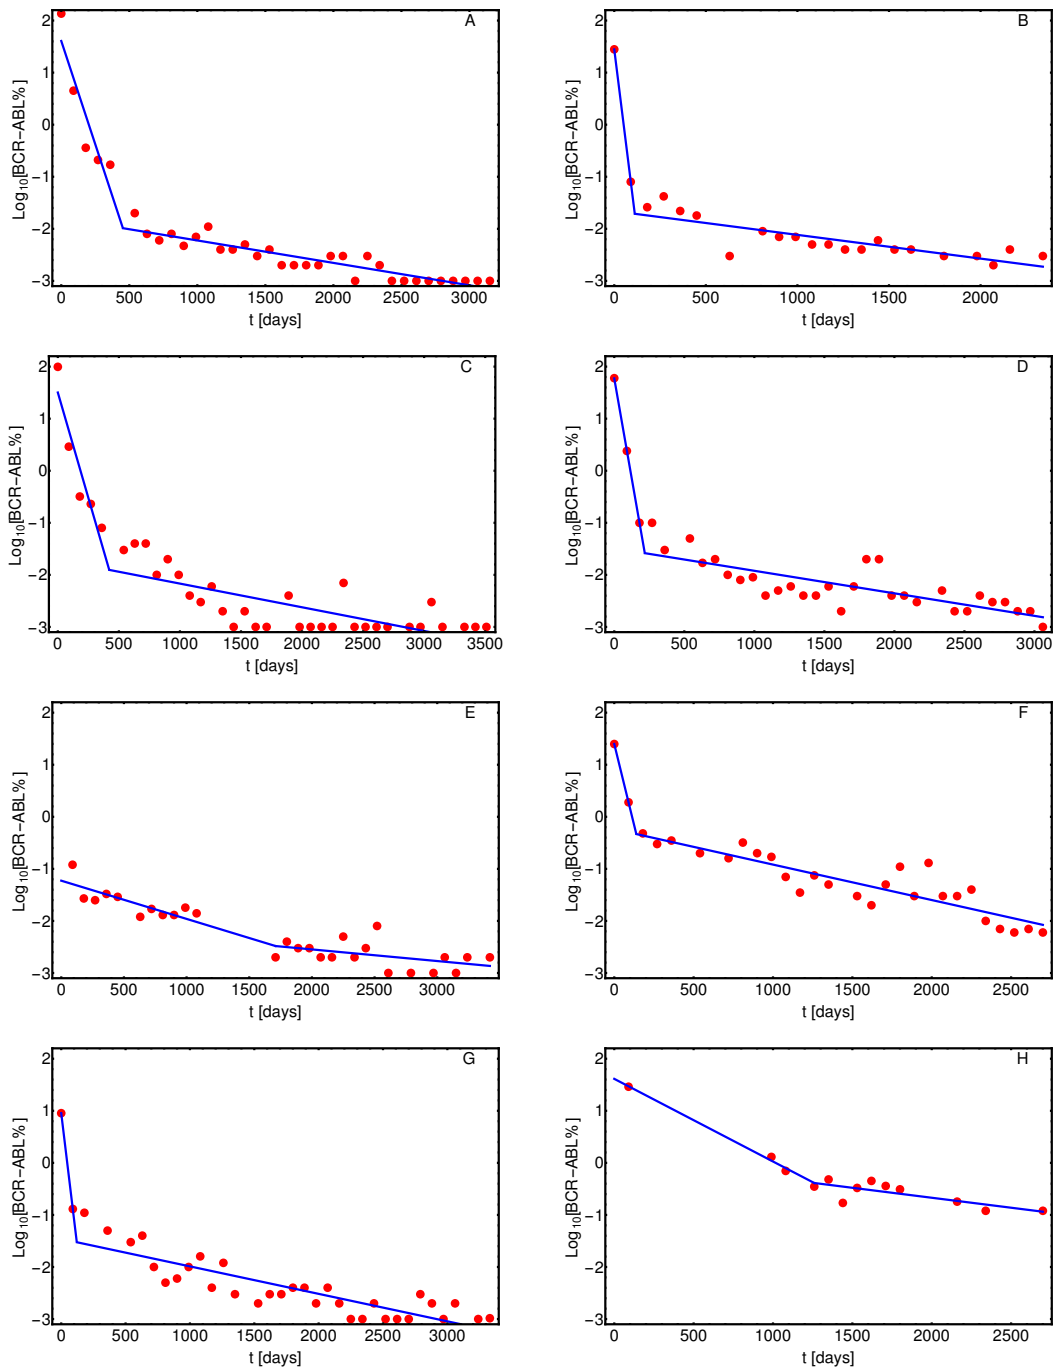

Figure S4: Data analysis. The red dots are the experimental points and they represents the expression of BCR-ABL. Blue lines are the best fits. Results of the data analysis are summarized in table S3.

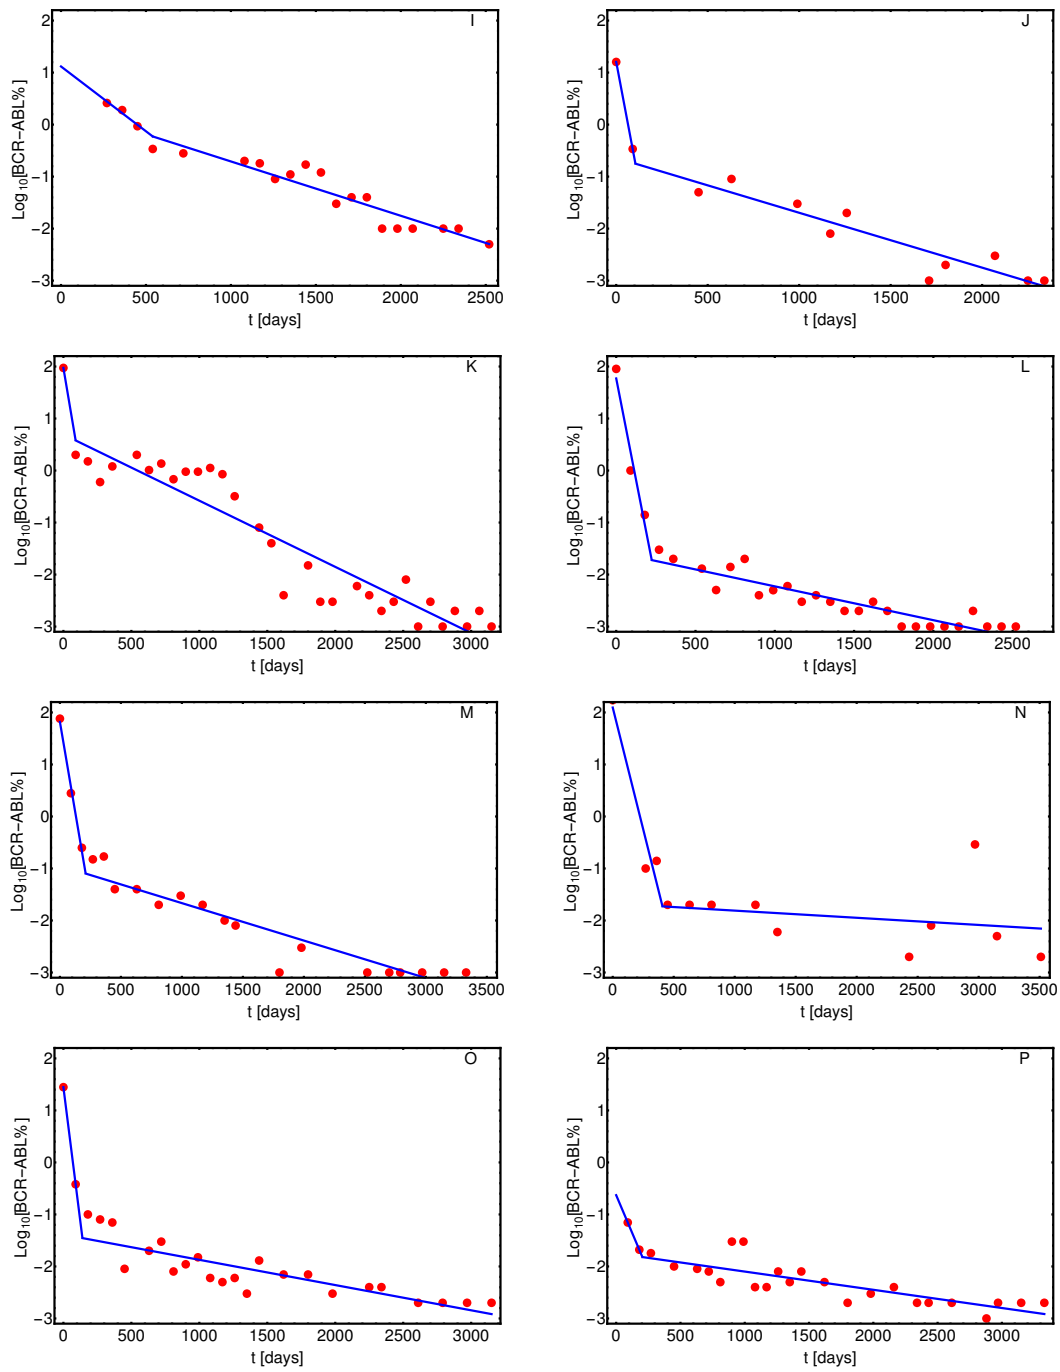

Figure S5: Data analysis. The red dots are the experimental points and they represents the expression of BCR-ABL. Blue lines are the best fits. Results of the data analysis are summarized in table S3

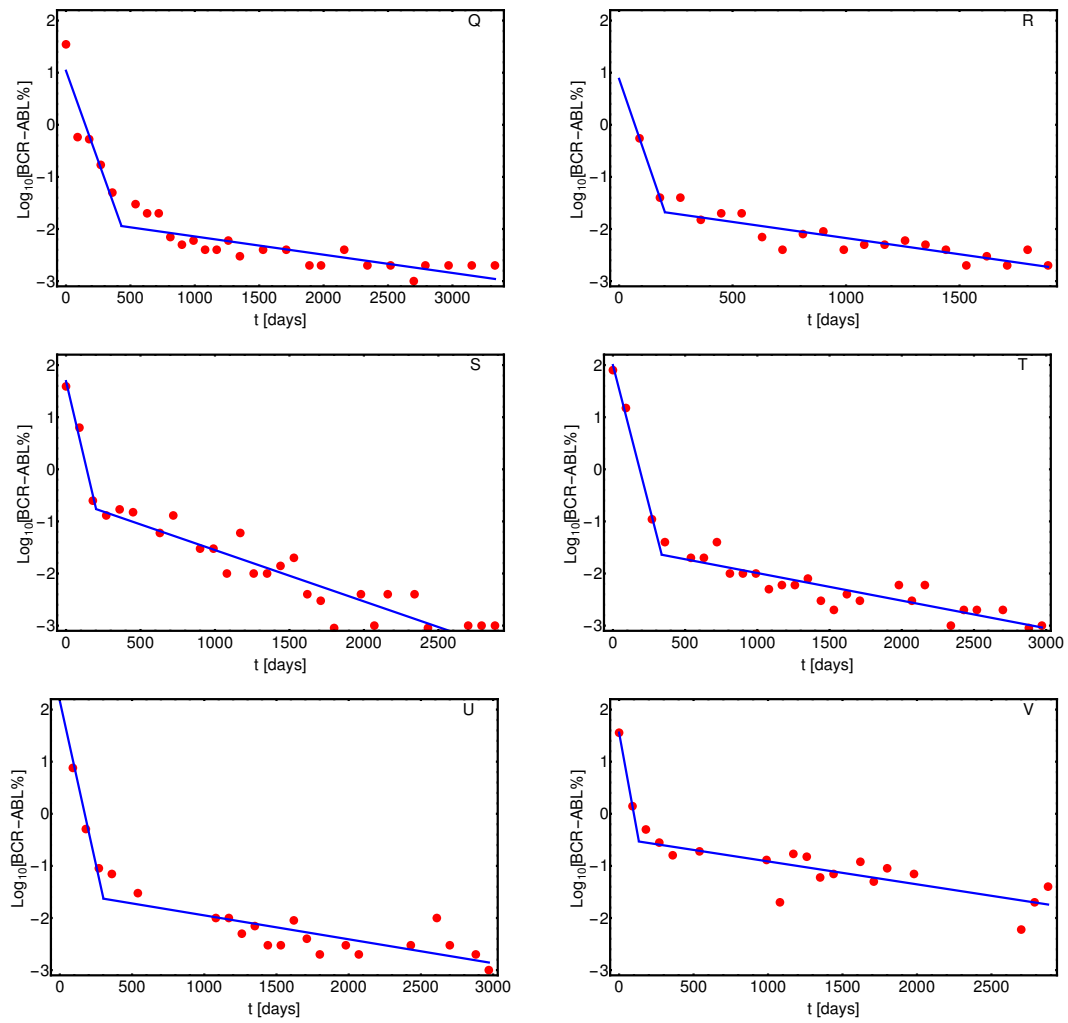

Figure S6: Data analysis. The red dots are the experimental points and they represents the expression of BCR-ABL. Blue lines are the best fits. Results of the data analysis are summarized in table S3

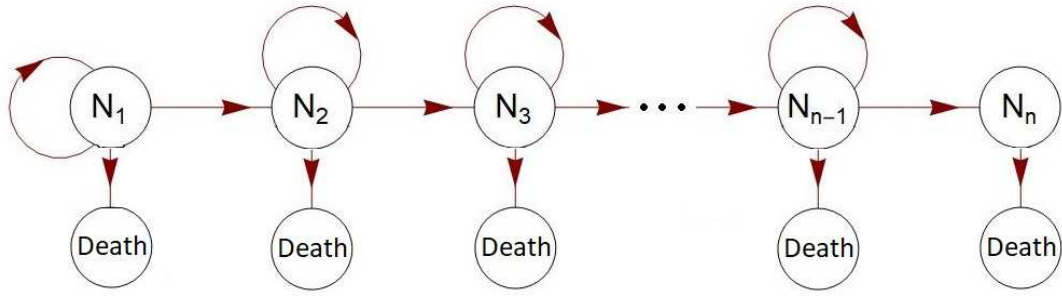

Figure S7: Diagram of compartmental model for an unregulated leukemic cells lineage.

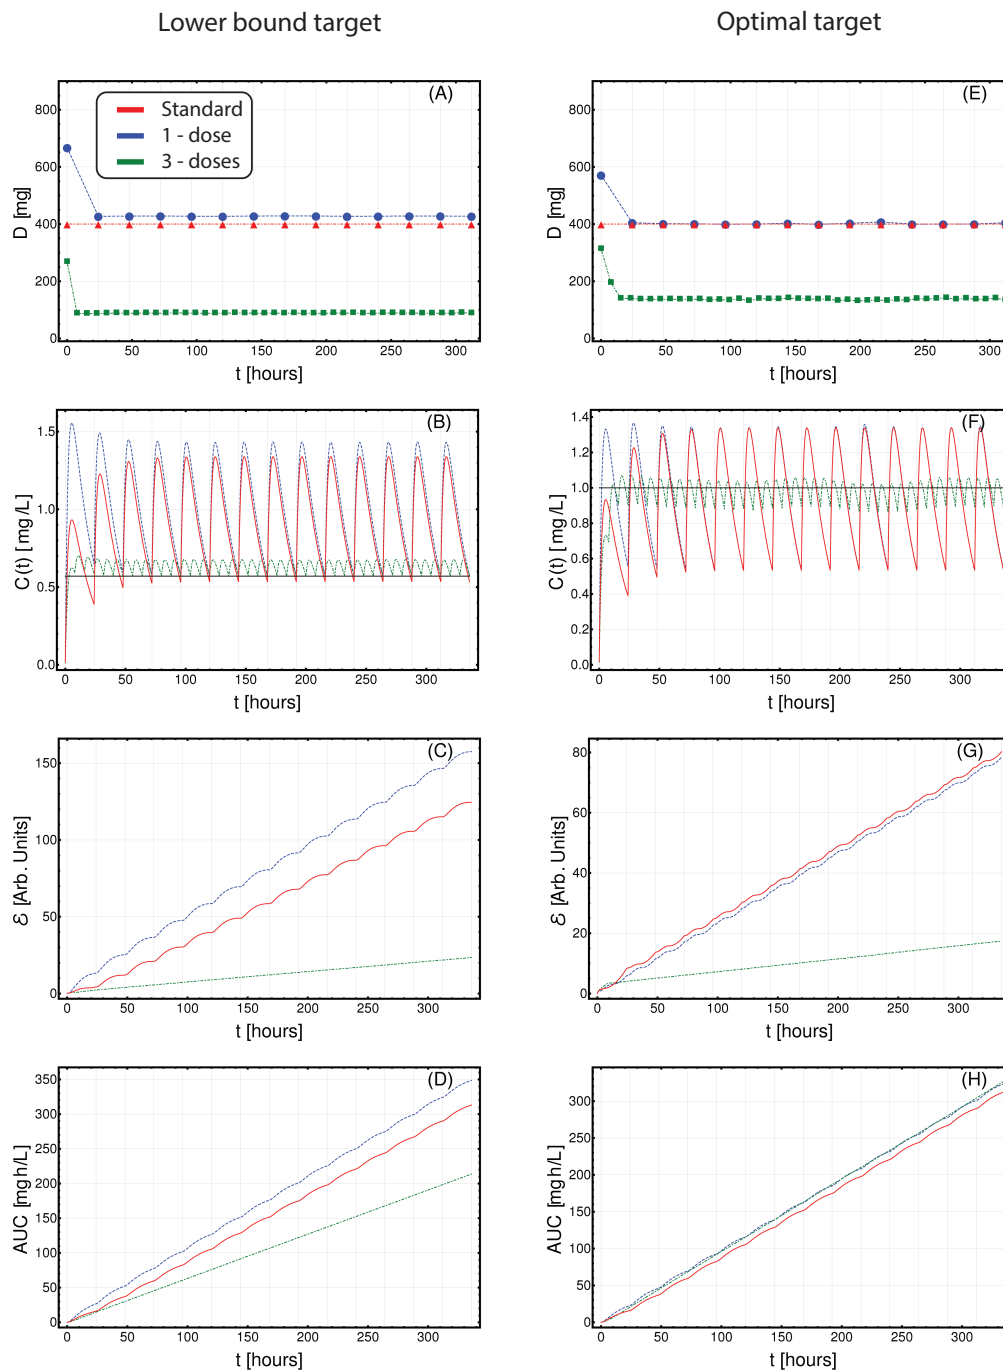

Figure S8: Optimized Imatinib administration returned by CT4TD for patient 0001 00002 RH from (Michor et al. (2005)), in the cases of: 1-dose/day (blue) and 3-doses/day (green), with respect to: *lower-bound* target concentration  $C_{targ} = 0.57 [mg/L]$  (left panels: A–D) and *optimal* target concentration  $C_{targ} = 1 [mg/L]$  (right panels: E–H). Standard administration – i.e., 400 mg Imatinib/day – is shown with a red dashed line. In this case, the optimization of PK/PD models is obtained on patient-specific PK parameters, without considering the PD models. (A,D) Imatinib scheduled dosage in  $mg$  (y axis), displayed on 14 days (x axis). (B–E) Imatinib concentration in blood in  $[mg/L]$  (y axis). (C–F) Variation of the cumulative distance between the observed concentration and the target in time. (D–H) The AUC in  $[mg \cdot h/L]$



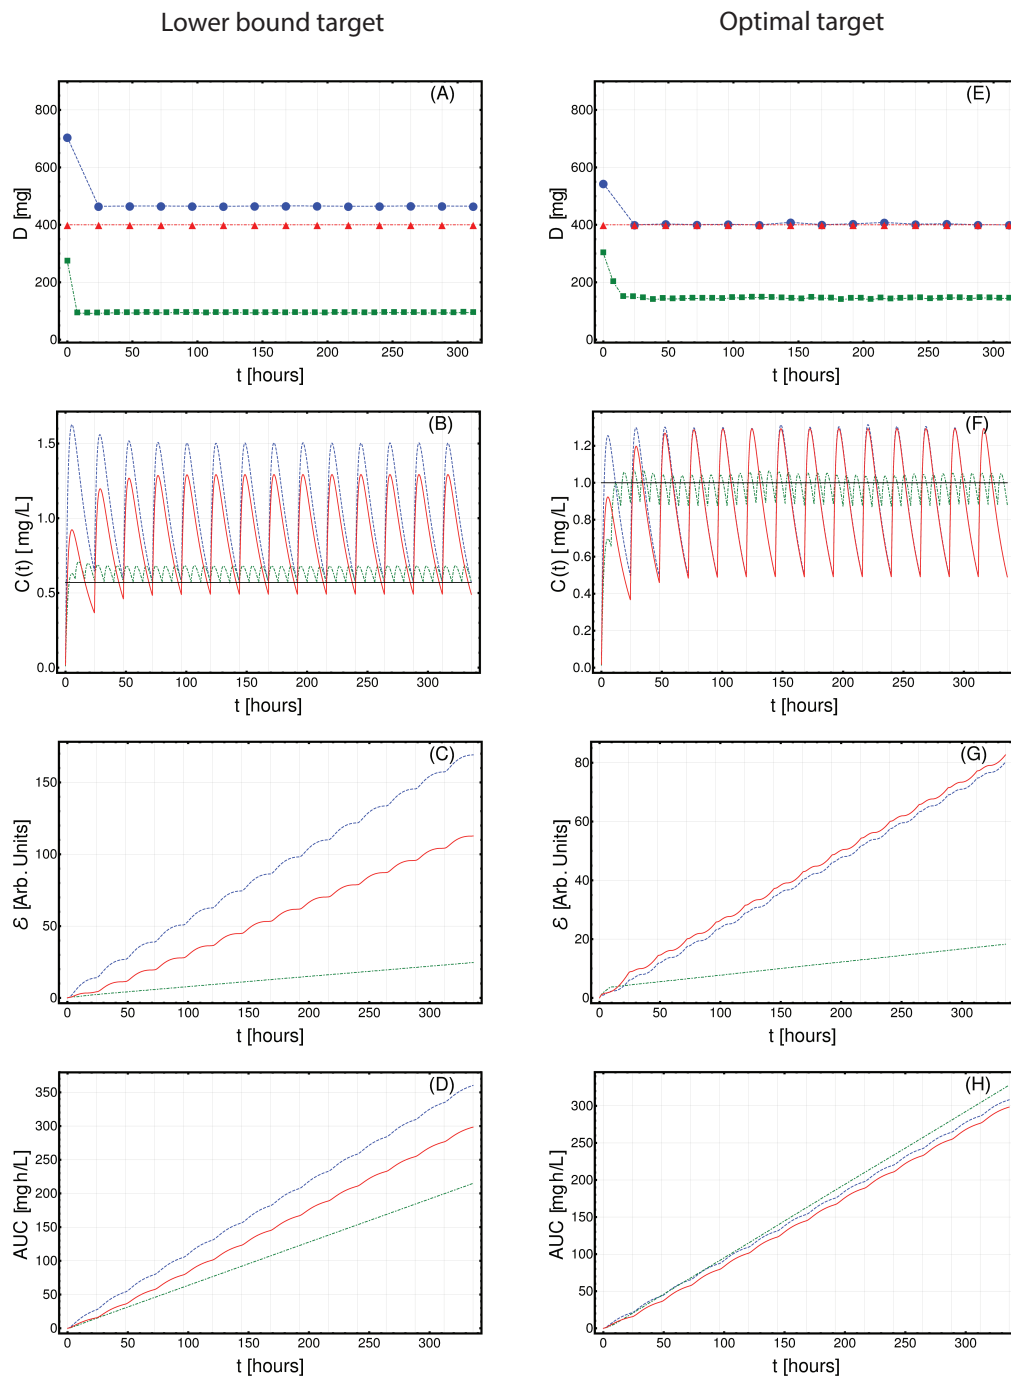

Figure S9: Optimized Imatinib administration returned by CT4TD for patient 0001 00006 GMC from (Michor et al. (2005)), in the cases of: 1-dose/day (blue) and 3-doses/day (green), with respect to: *lower-bound* target concentration  $C_{targ} = 0.57 [mg/L]$  (left panels: A–D) and *optimal* target concentration  $C_{targ} = 1 [mg/L]$  (right panels: E–H). Standard administration – i.e., 400 mg Imatinib/day – is shown with a red dashed line. In this case, the optimization of PK/PD models is obtained on patient-specific PK parameters, without considering the PD models. (A,D) Imatinib scheduled dosage in  $mg$  (y axis), displayed on 14 days (x axis). (B–E) Imatinib concentration in blood in  $[mg/L]$  (y axis). (C–F) Variation of the cumulative distance between the observed concentration and the target in time. (D–H) The AUC in  $[mg \cdot h/L]$

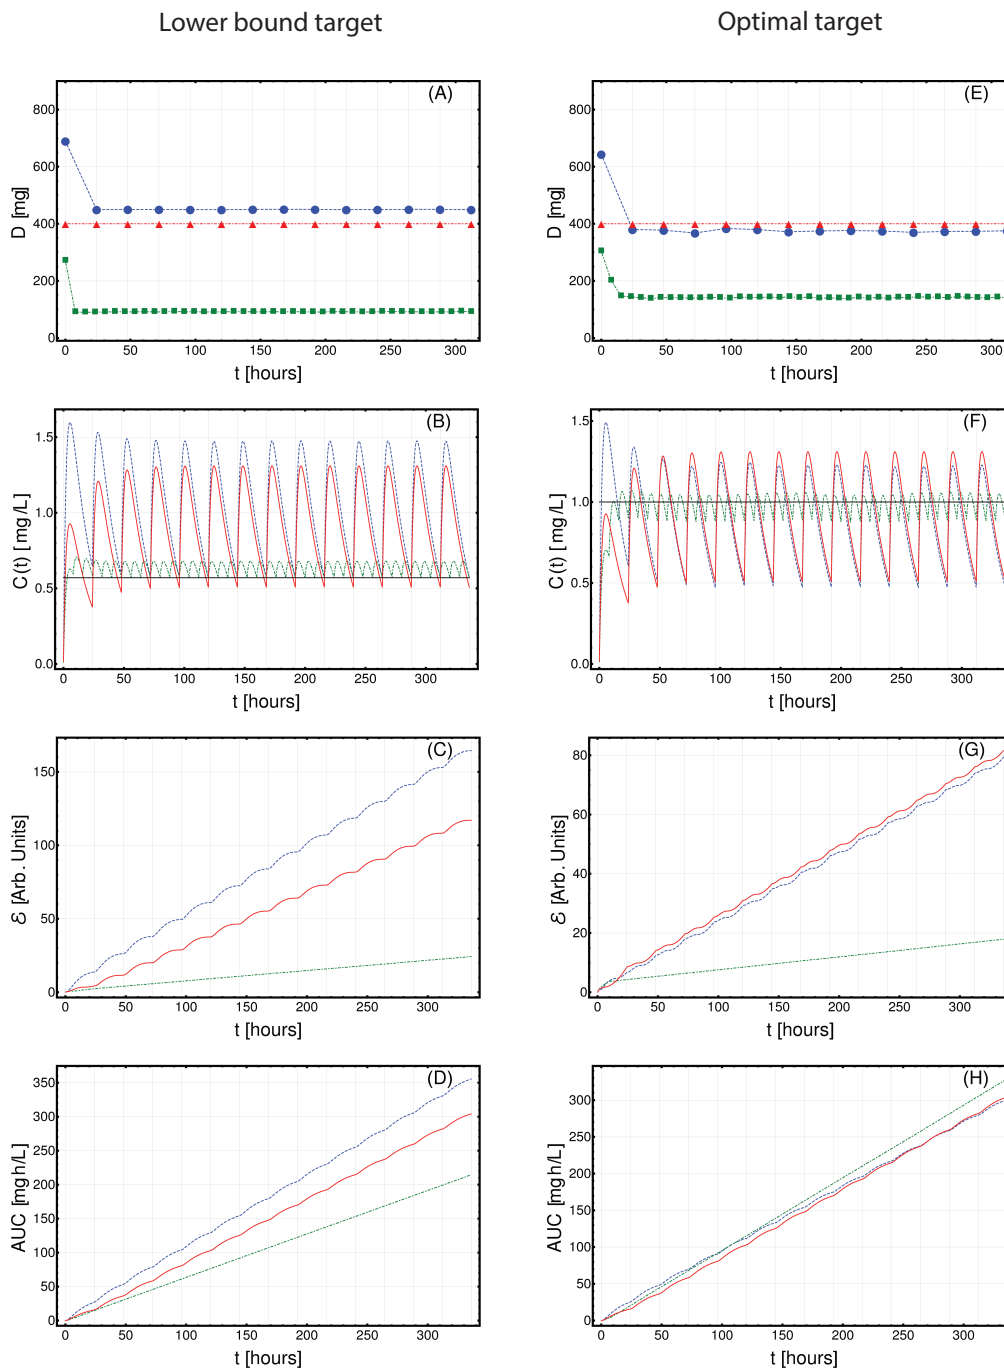

Figure S10: Optimized Imatinib administration returned by CT4TD for patient 0001 00009 MJG from (Michor et al. (2005)), in the cases of: 1-dose/day (blue) and 3-doses/day (green), with respect to: *lower-bound* target concentration  $C_{targ} = 0.57 [mg/L]$  (left panels: A–D) and *optimal* target concentration  $C_{targ} = 1 [mg/L]$  (right panels: E–H). Standard administration – i.e., 400 mg Imatinib/day – is shown with a red dashed line. In this case, the optimization of PK/PD models is obtained on patient-specific PK parameters, without considering the PD models. (A,D) Imatinib scheduled dosage in  $mg$  (y axis), displayed on 14 days (x axis). (B–E) Imatinib concentration in blood in  $[mg/L]$  (y axis). (C–F) Variation of the cumulative distance between the observed concentration and the target in time. (D–H) The AUC in  $[mg \cdot h/L]$

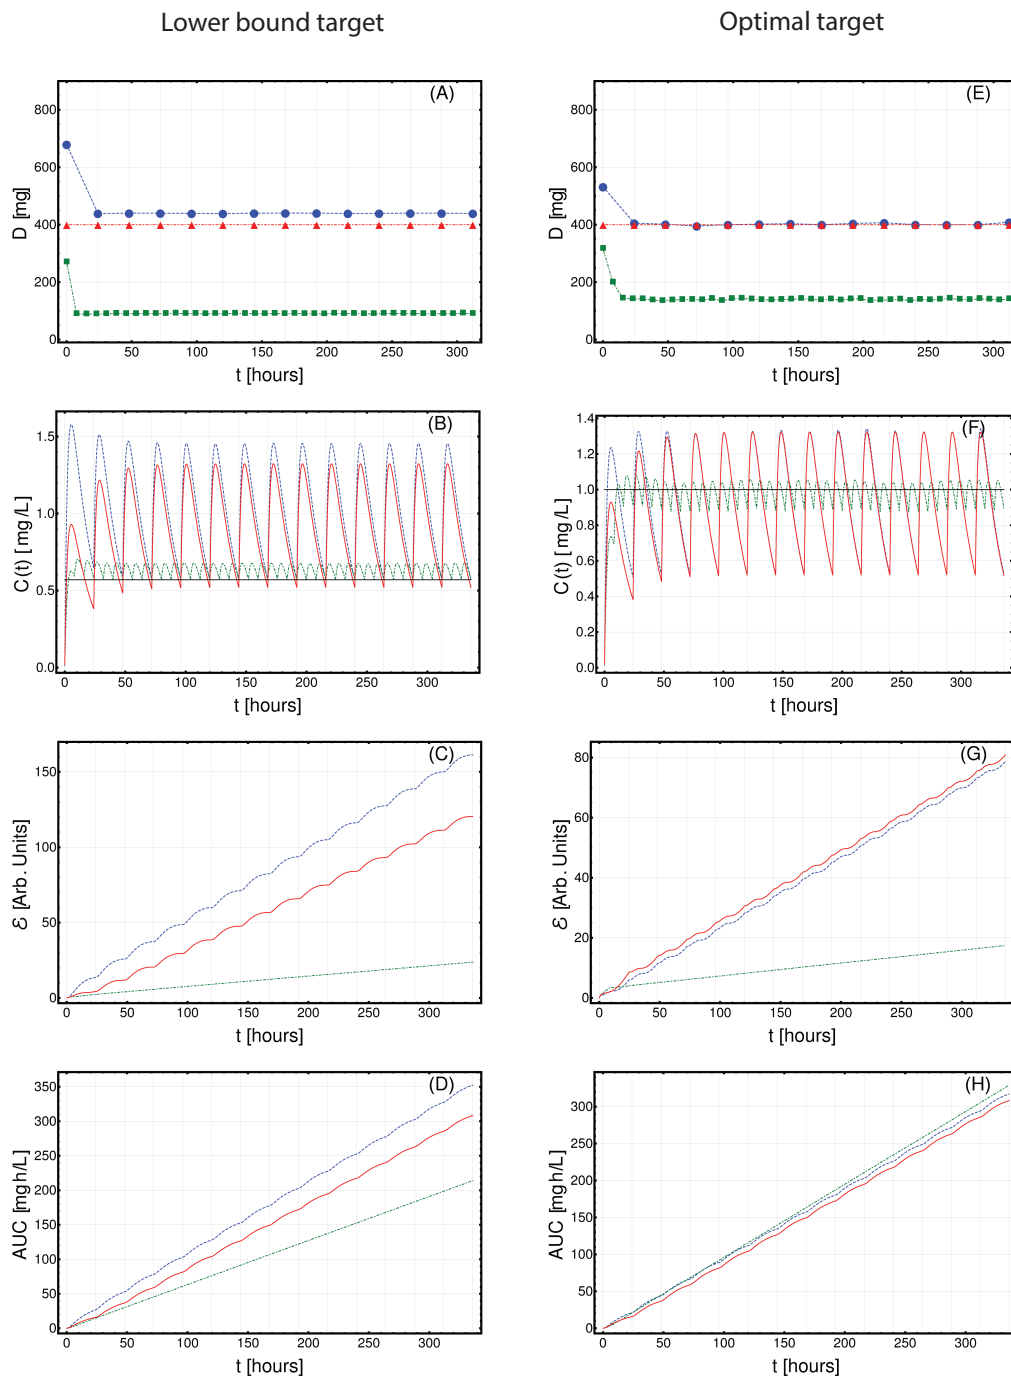

Figure S11: Optimized Imatinib administration returned by CT4TD for patient 0002 00003 SMV from (Michor et al. (2005)), in the cases of: 1-dose/day (blue) and 3-doses/day (green), with respect to: *lower-bound* target concentration  $C_{targ} = 0.57 [mg/L]$  (left panels: A–D) and *optimal* target concentration  $C_{targ} = 1 [mg/L]$  (right panels: E–H). Standard administration – i.e., 400 mg Imatinib/day – is shown with a red dashed line. In this case, the optimization of PK/PD models is obtained on patient-specific PK parameters, without considering the PD models. (A,D) Imatinib scheduled dosage in  $mg$  (y axis), displayed on 14 days (x axis). (B–E) Imatinib concentration in blood in  $[mg/L]$  (y axis). (C–F) Variation of the cumulative distance between the observed concentration and the target in time. (D–H) The AUC in  $[mg \cdot h/L]$

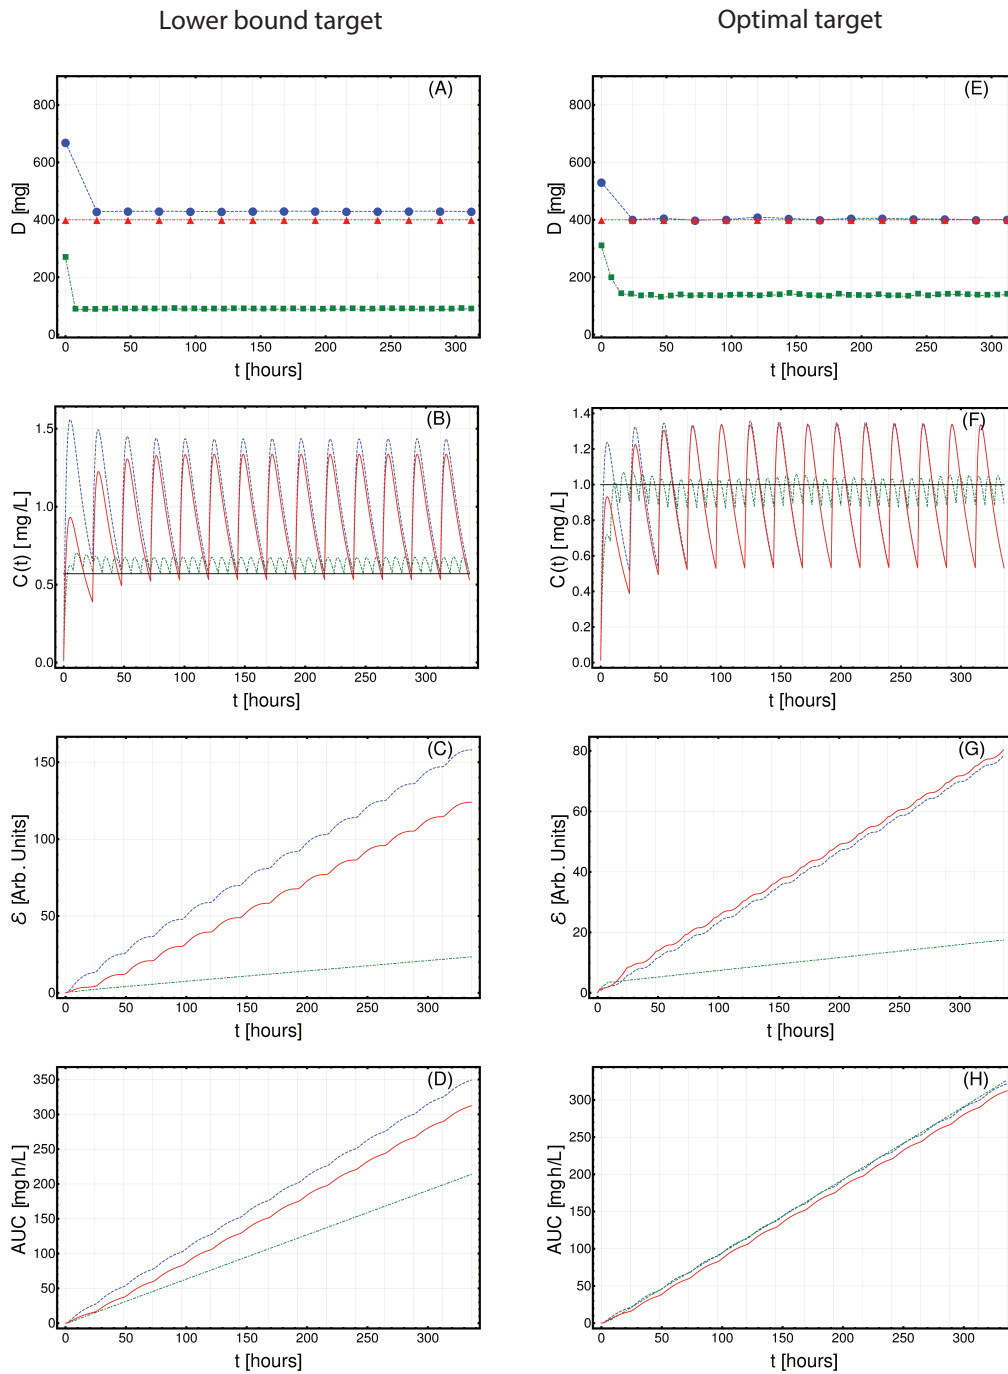

Figure S12: Optimized Imatinib administration returned by CT4TD for patient 0002 00003 PMG from (Michor et al. (2005)), in the cases of: 1-dose/day (blue) and 3-doses/day (green), with respect to: *lower-bound* target concentration  $C_{targ} = 0.57 [mg/L]$  (left panels: A–D) and *optimal* target concentration  $C_{targ} = 1 [mg/L]$  (right panels: E–H). Standard administration – i.e., 400 mg Imatinib/day – is shown with a red dashed line. In this case, the optimization of PK/PD models is obtained on patient-specific PK parameters, without considering the PD models. (A,D) Imatinib scheduled dosage in  $mg$  (y axis), displayed on 14 days (x axis). (B–E) Imatinib concentration in blood in  $[mg/L]$  (y axis). (C–F) Variation of the cumulative distance between the observed concentration and the target in time. (D–H) The AUC in  $[mg \cdot h/L]$

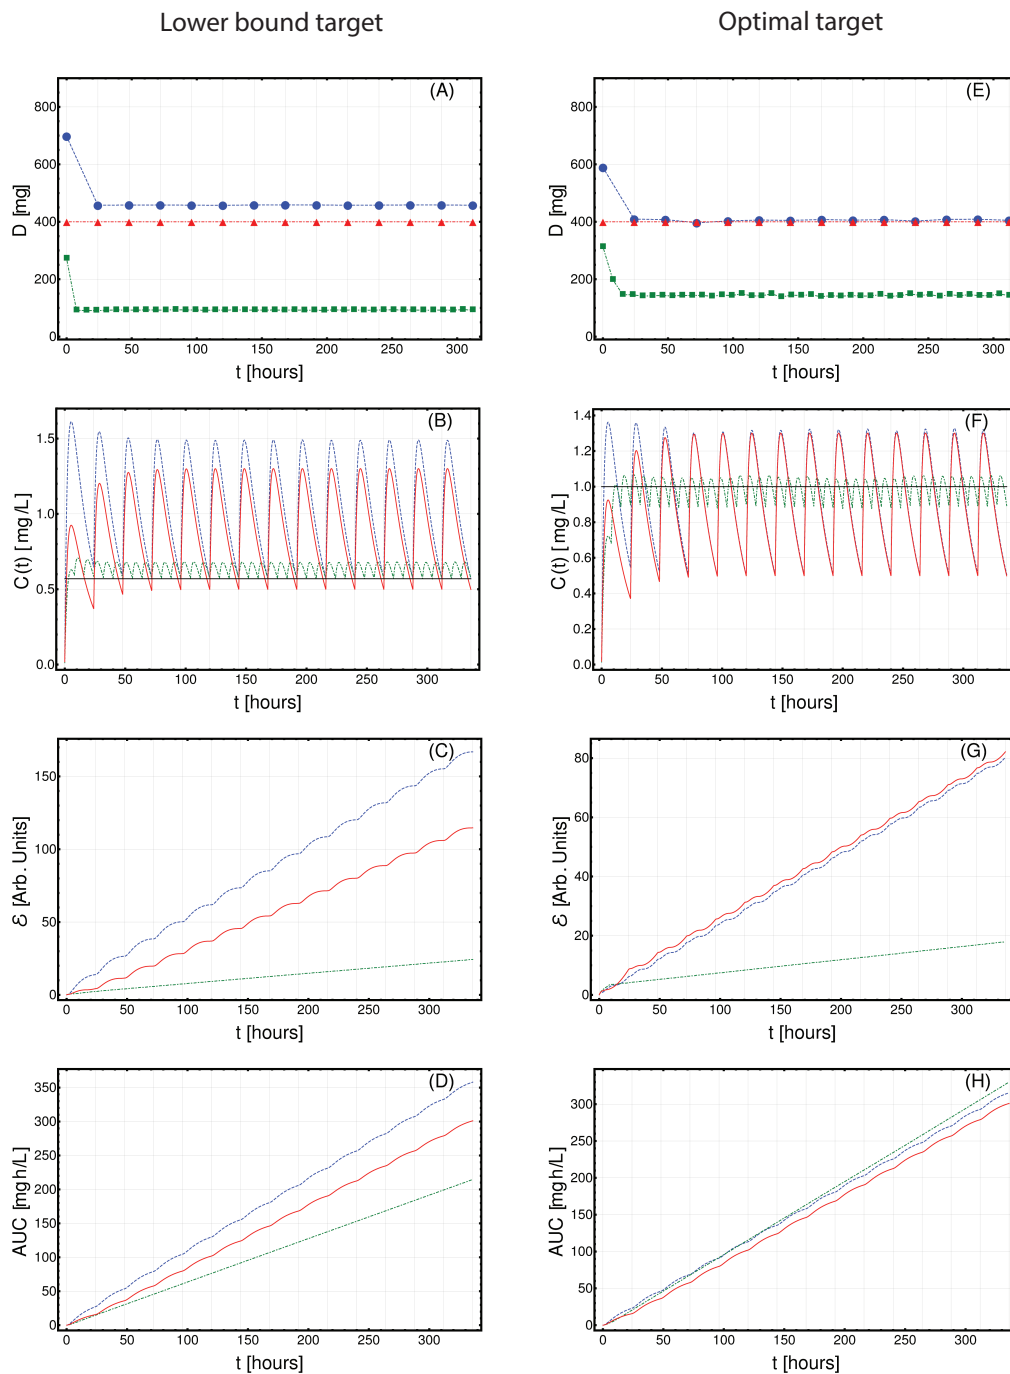

Figure S13: Optimized Imatinib administration returned by CT4TD for patient 0002 00008 SAT from (Michor et al. (2005)), in the cases of: 1-dose/day (blue) and 3-doses/day (green), with respect to: *lower-bound* target concentration  $C_{targ} = 0.57 [mg/L]$  (left panels: A–D) and *optimal* target concentration  $C_{targ} = 1 [mg/L]$  (right panels: E–H). Standard administration – i.e., 400 mg Imatinib/day – is shown with a red dashed line. In this case, the optimization of PK/PD models is obtained on patient-specific PK parameters, without considering the PD models. (A,D) Imatinib scheduled dosage in  $mg$  (y axis), displayed on 14 days (x axis). (B–E) Imatinib concentration in blood in  $[mg/L]$  (y axis). (C–F) Variation of the cumulative distance between the observed concentration and the target in time.AF (D–H) The AUC in  $[mg \cdot h/L]$

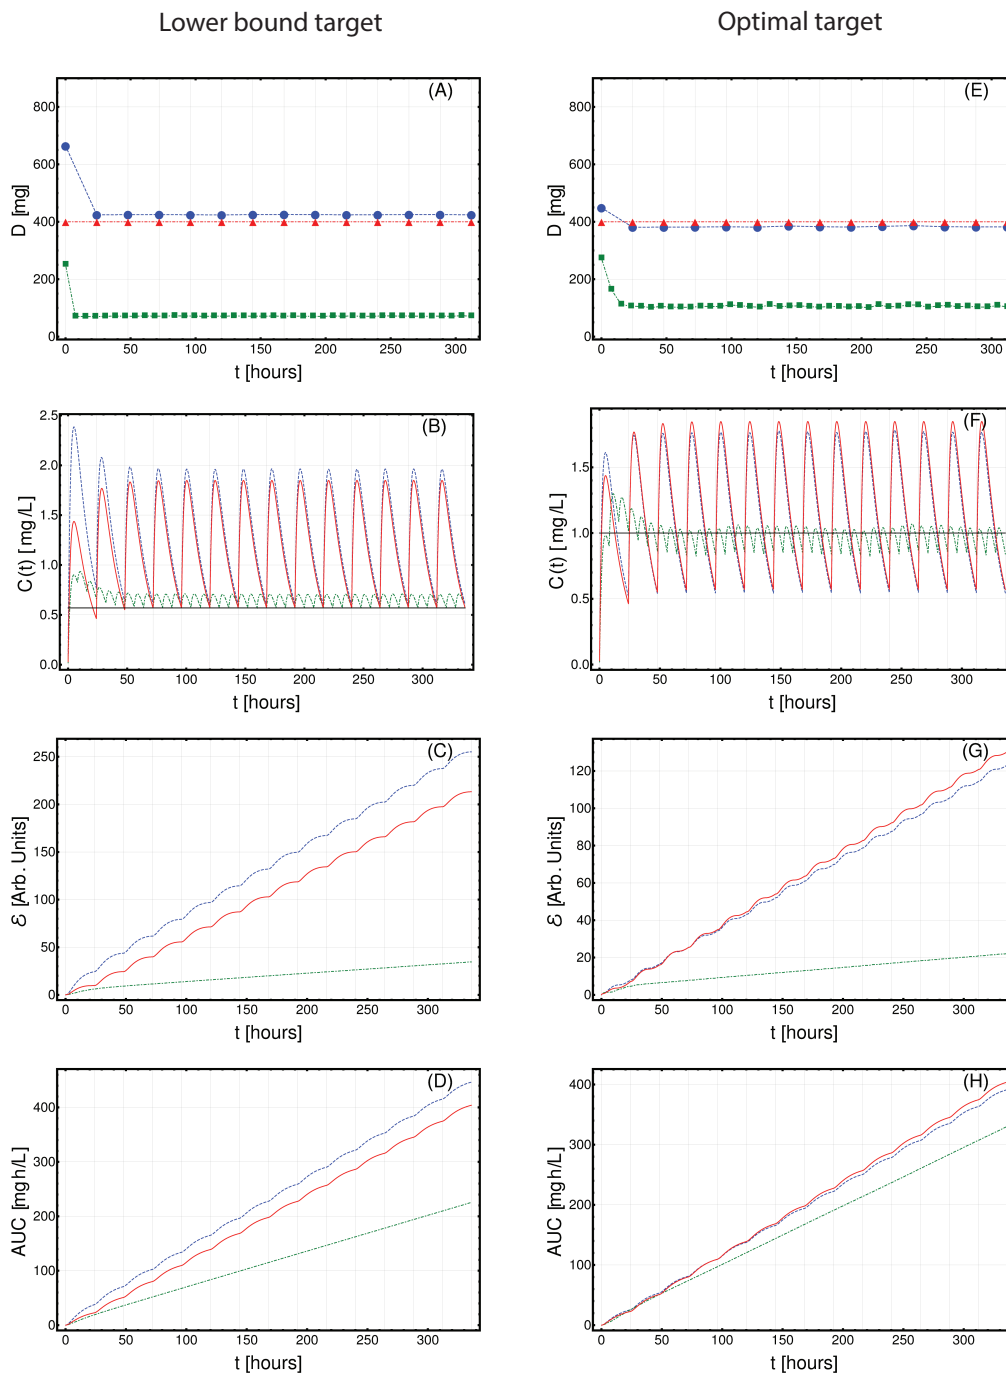

Figure S14: Optimized Imatinib administration returned by CT4TD for patient 0003 00002 CL from (Michor et al. (2005)), in the cases of: 1-dose/day (blue) and 3-doses/day (green), with respect to: *lower-bound* target concentration  $C_{targ} = 0.57 [mg/L]$  (left panels: A–D) and *optimal* target concentration  $C_{targ} = 1 [mg/L]$  (right panels: E–H). Standard administration – i.e., 400 mg Imatinib/day – is shown with a red dashed line. In this case, the optimization of PK/PD models is obtained on patient-specific PK parameters, without considering the PD models. (A,D) Imatinib scheduled dosage in  $mg$  (y axis), displayed on 14 days (x axis). (B–E) Imatinib concentration in blood in  $[mg/L]$  (y axis). (C–F) Variation of the cumulative distance between the observed concentration and the target in time. (D–H) The AUC in  $[mg \cdot h/L]$

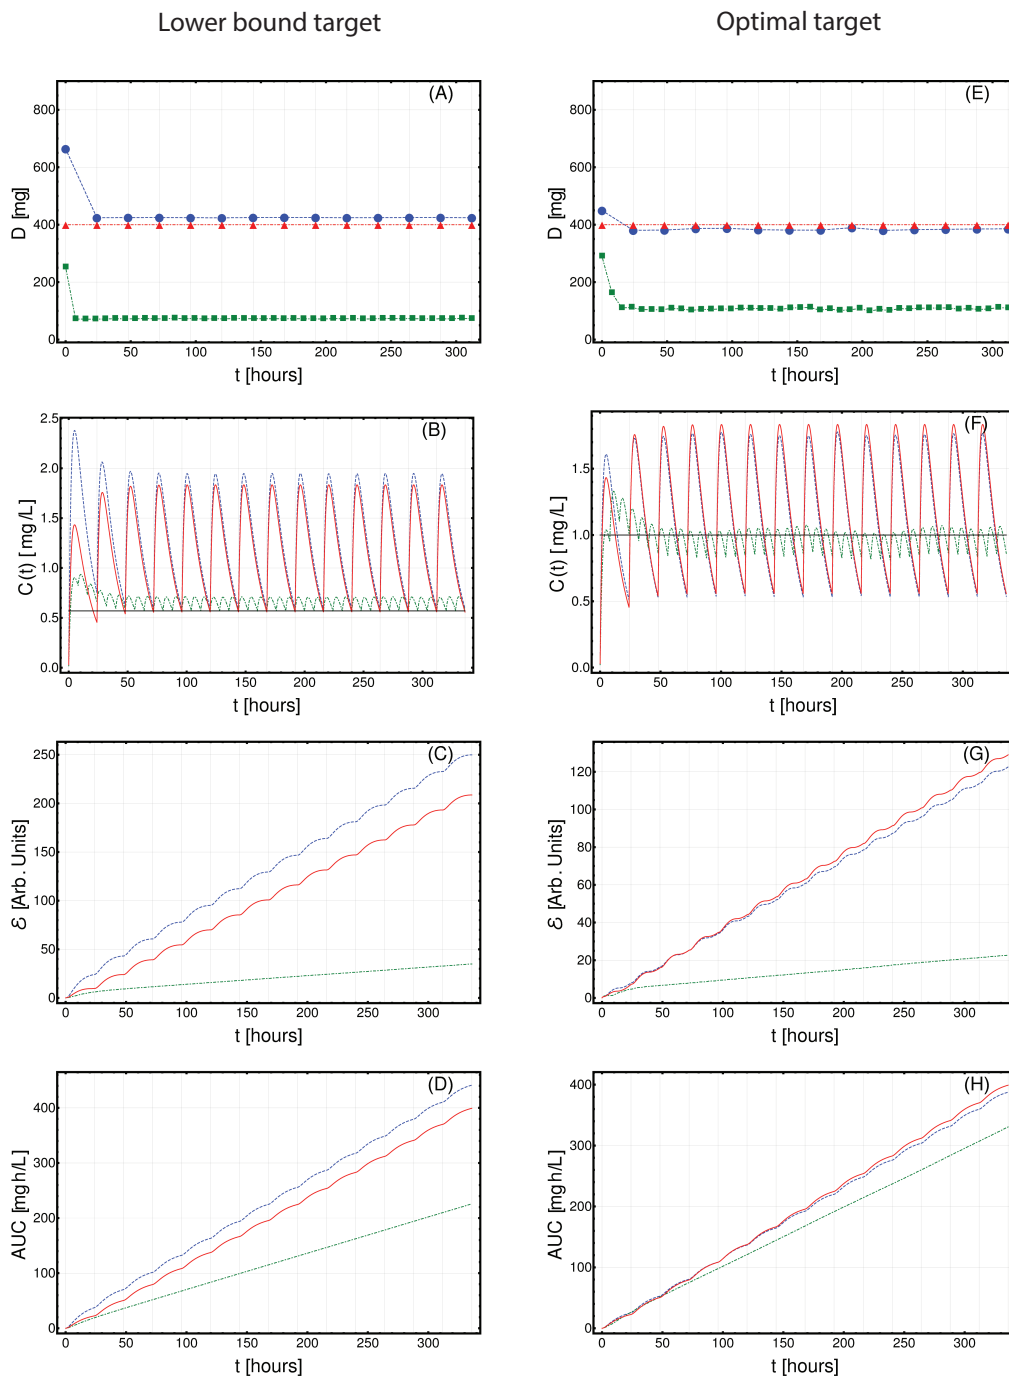

Figure S15: Optimized Imatinib administration returned by CT4TD for patient 0004 00003 CAR from (Michor et al. (2005)), in the cases of: 1-dose/day (blue) and 3-doses/day (green), with respect to: *lower-bound* target concentration  $C_{targ} = 0.57 [mg/L]$  (left panels: A–D) and *optimal* target concentration  $C_{targ} = 1 [mg/L]$  (right panels: E–H). Standard administration – i.e., 400 mg Imatinib/day – is shown with a red dashed line. In this case, the optimization of PK/PD models is obtained on patient-specific PK parameters, without considering the PD models. (A,D) Imatinib scheduled dosage in  $mg$  (y axis), displayed on 14 days (x axis). (B–E) Imatinib concentration in blood in  $[mg/L]$  (y axis). (C–F) Variation of the cumulative distance between the observed concentration and the target in time. (D–H) The AUC in  $[mg \cdot h/L]$

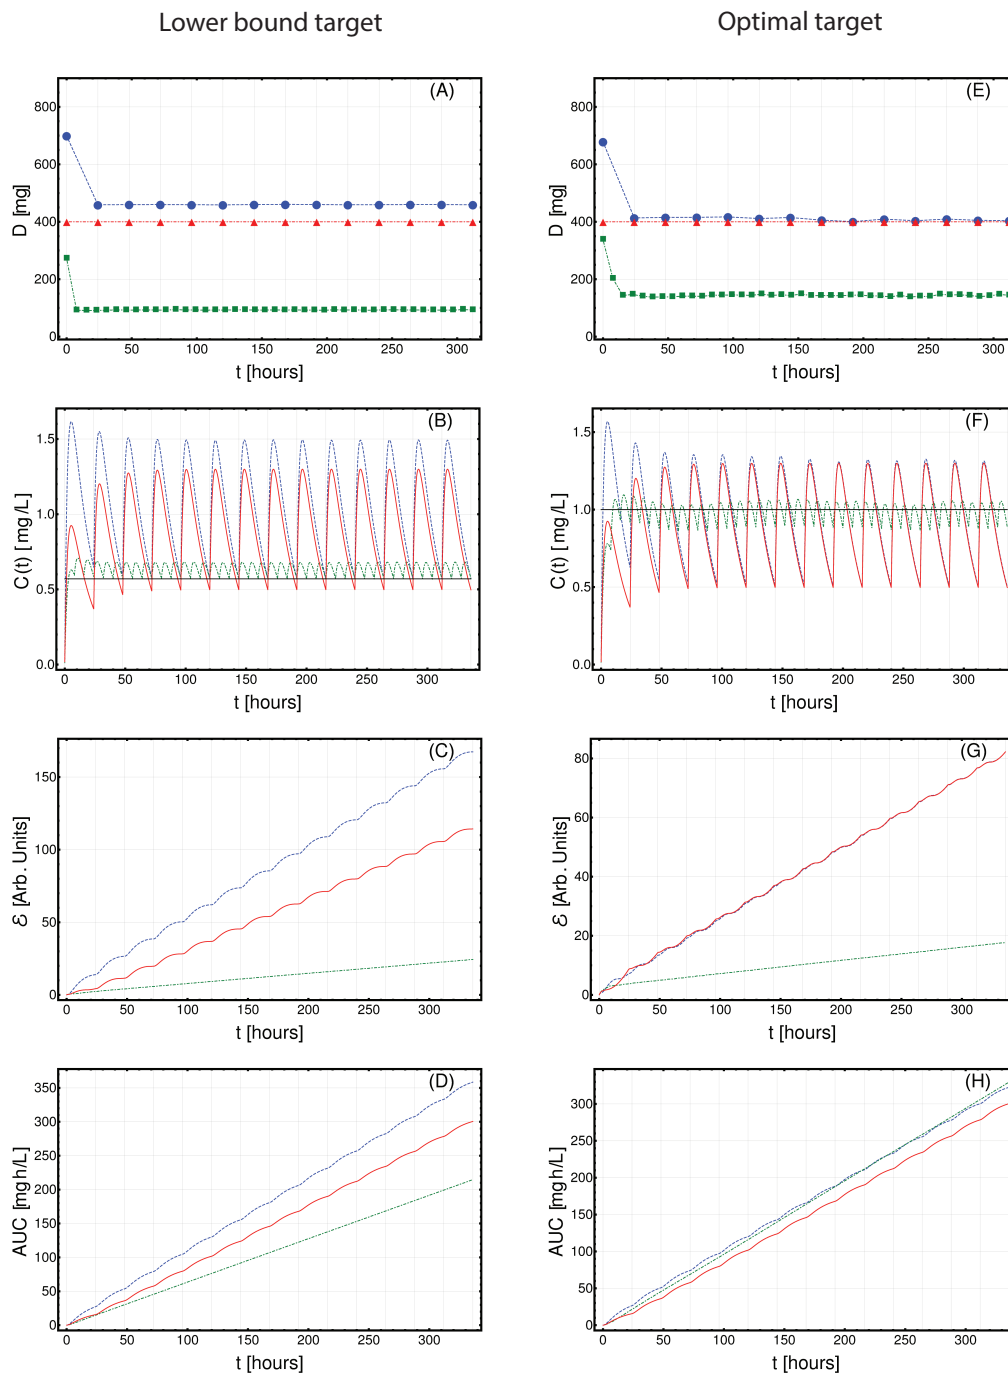

Figure S16: Optimized Imatinib administration returned by CT4TD for patient 0004 00006 GM from (Michor et al. (2005)), in the cases of: 1-dose/day (blue) and 3-doses/day (green), with respect to: *lower-bound* target concentration  $C_{targ} = 0.57 [mg/L]$  (left panels: A–D) and *optimal* target concentration  $C_{targ} = 1 [mg/L]$  (right panels: E–H). Standard administration – i.e., 400 mg Imatinib/day – is shown with a red dashed line. In this case, the optimization of PK/PD models is obtained on patient-specific PK parameters, without considering the PD models. (A,D) Imatinib scheduled dosage in  $mg$  (y axis), displayed on 14 days (x axis). (B–E) Imatinib concentration in blood in  $[mg/L]$  (y axis). (C–F) Variation of the cumulative distance between the observed concentration and the target in time. (D–H) The AUC in  $[mg \cdot h/L]$



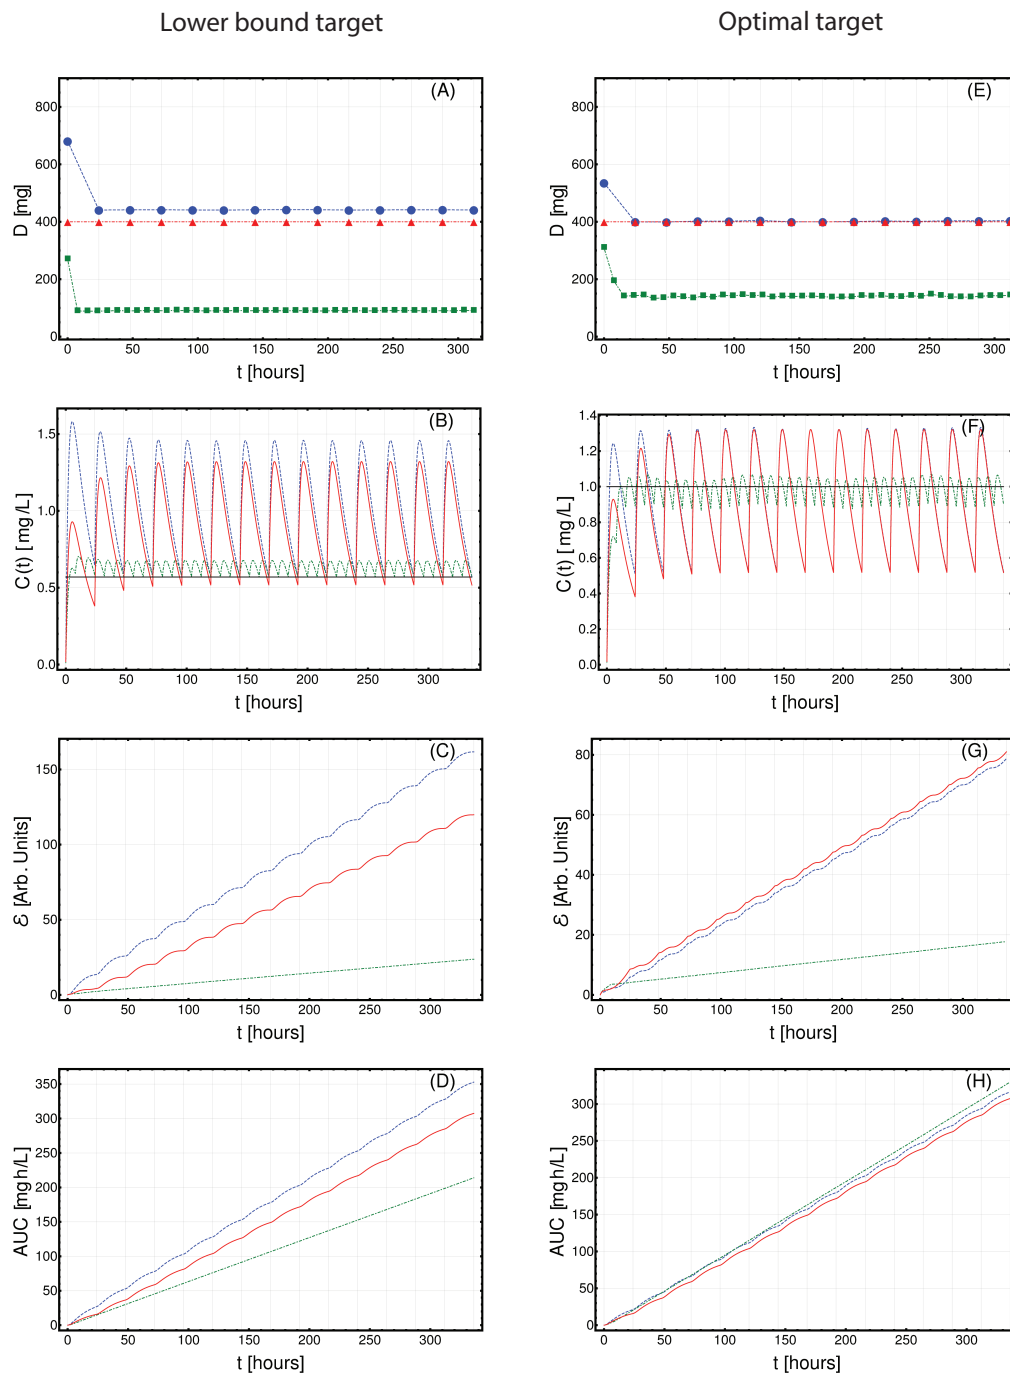

Figure S17: Optimized Imatinib administration returned by CT4TD for patient 0006 00006 ML from (Michor et al. (2005)), in the cases of: 1-dose/day (blue) and 3-doses/day (green), with respect to: *lower-bound* target concentration  $C_{targ} = 0.57 [mg/L]$  (left panels: A–D) and *optimal* target concentration  $C_{targ} = 1 [mg/L]$  (right panels: E–H). Standard administration – i.e., 400 mg Imatinib/day – is shown with a red dashed line. In this case, the optimization of PK/PD models is obtained on patient-specific PK parameters, without considering the PD models. (A,D) Imatinib scheduled dosage in  $mg$  (y axis), displayed on 14 days (x axis). (B-E) Imatinib concentration in blood in  $[mg/L]$  (y axis). (C-F) Variation of the cumulative distance between the observed concentration and the target in time. (D-H) The AUC in  $[mg \cdot h/L]$

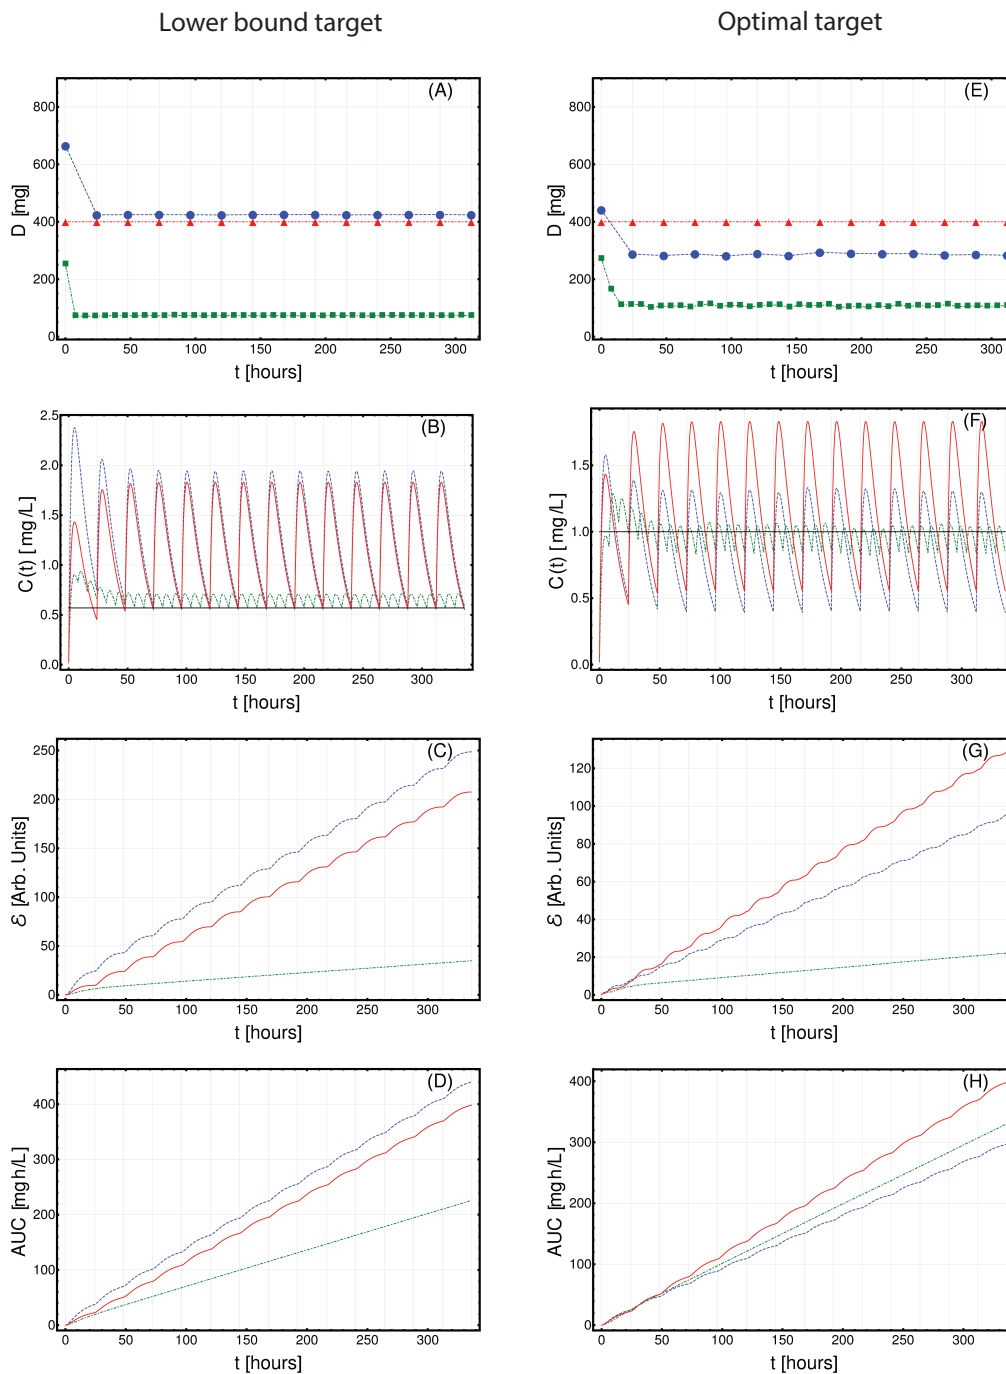

Figure S18: Optimized Imatinib administration returned by CT4TD for patient 0006 00007 RJW from (Michor et al. (2005)), in the cases of: 1-dose/day (blue) and 3-doses/day (green), with respect to: *lower-bound* target concentration  $C_{targ} = 0.57 [mg/L]$  (left panels: A–D) and *optimal* target concentration  $C_{targ} = 1 [mg/L]$  (right panels: E–H). Standard administration – i.e., 400 mg Imatinib/day – is shown with a red dashed line. In this case, the optimization of PK/PD models is obtained on patient-specific PK parameters, without considering the PD models. (A,D) Imatinib scheduled dosage in  $mg$  (y axis), displayed on 14 days (x axis). (B–E) Imatinib concentration in blood in  $[mg/L]$  (y axis). (C–F) Variation of the cumulative distance between the observed concentration and the target in time. (D–H) The AUC in  $[mg \cdot h/L]$

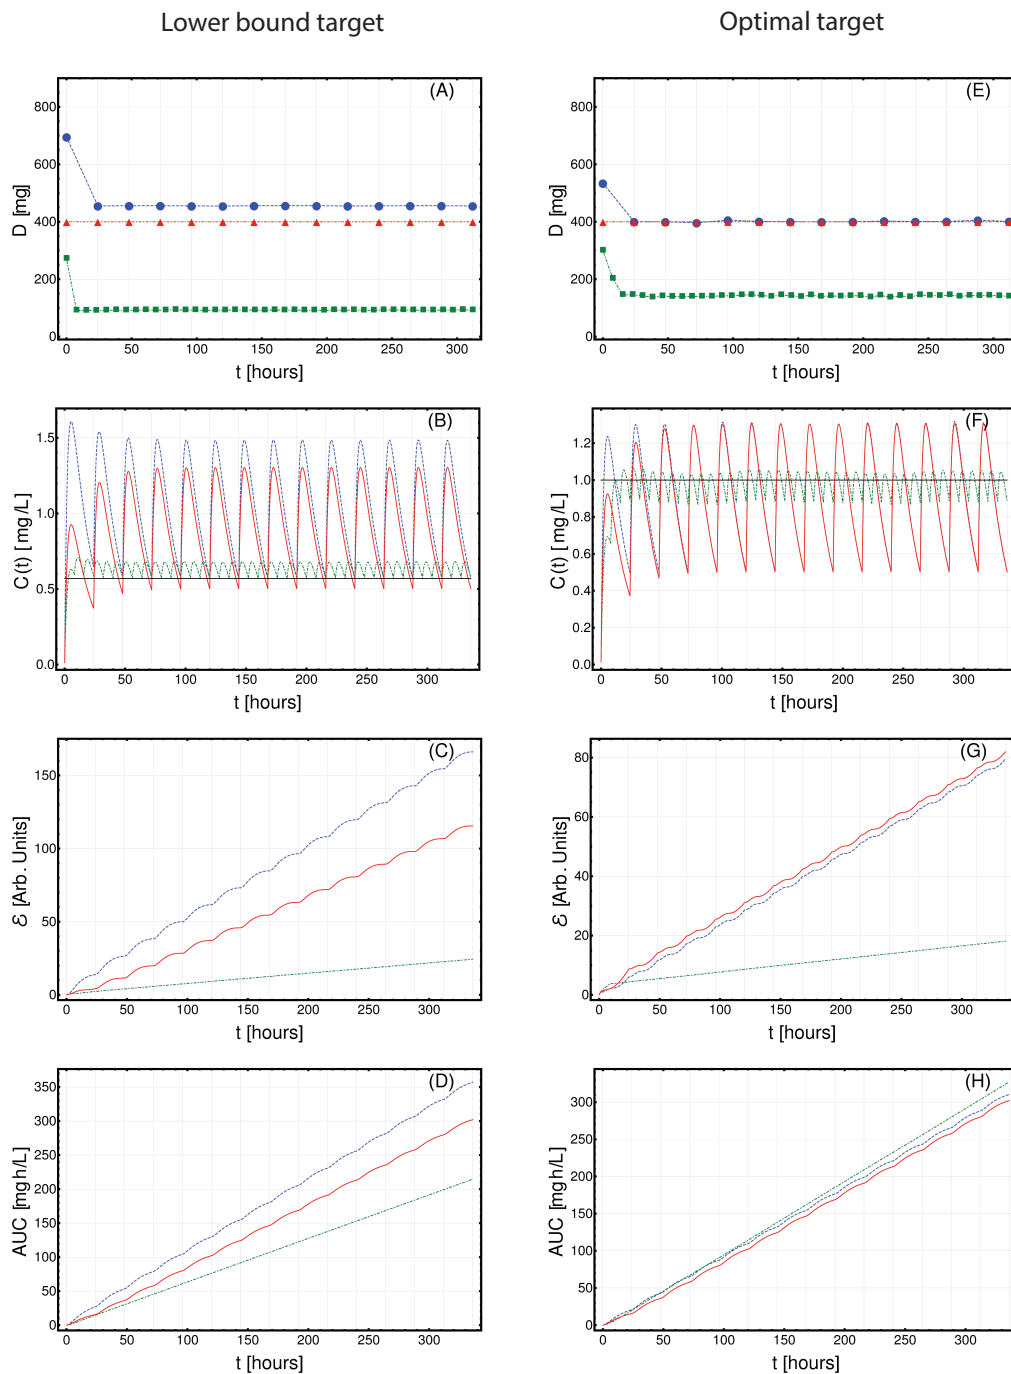

Figure S19: Optimized Imatinib administration returned by CT4TD for patient 0007 00001 AJV from (Michor et al. (2005)), in the cases of: 1-dose/day (blue) and 3-doses/day (green), with respect to: *lower-bound* target concentration  $C_{targ} = 0.57 [mg/L]$  (left panels: A–D) and *optimal* target concentration  $C_{targ} = 1 [mg/L]$  (right panels: E–H). Standard administration – i.e., 400 mg Imatinib/day – is shown with a red dashed line. In this case, the optimization of PK/PD models is obtained on patient-specific PK parameters, without considering the PD models. (A,D) Imatinib scheduled dosage in  $mg$  (y axis), displayed on 14 days (x axis). (B–E) Imatinib concentration in blood in  $[mg/L]$  (y axis). (C–F) Variation of the cumulative distance between the observed concentration and the target in time. (D–H) The AUC in  $[mg \cdot h/L]$

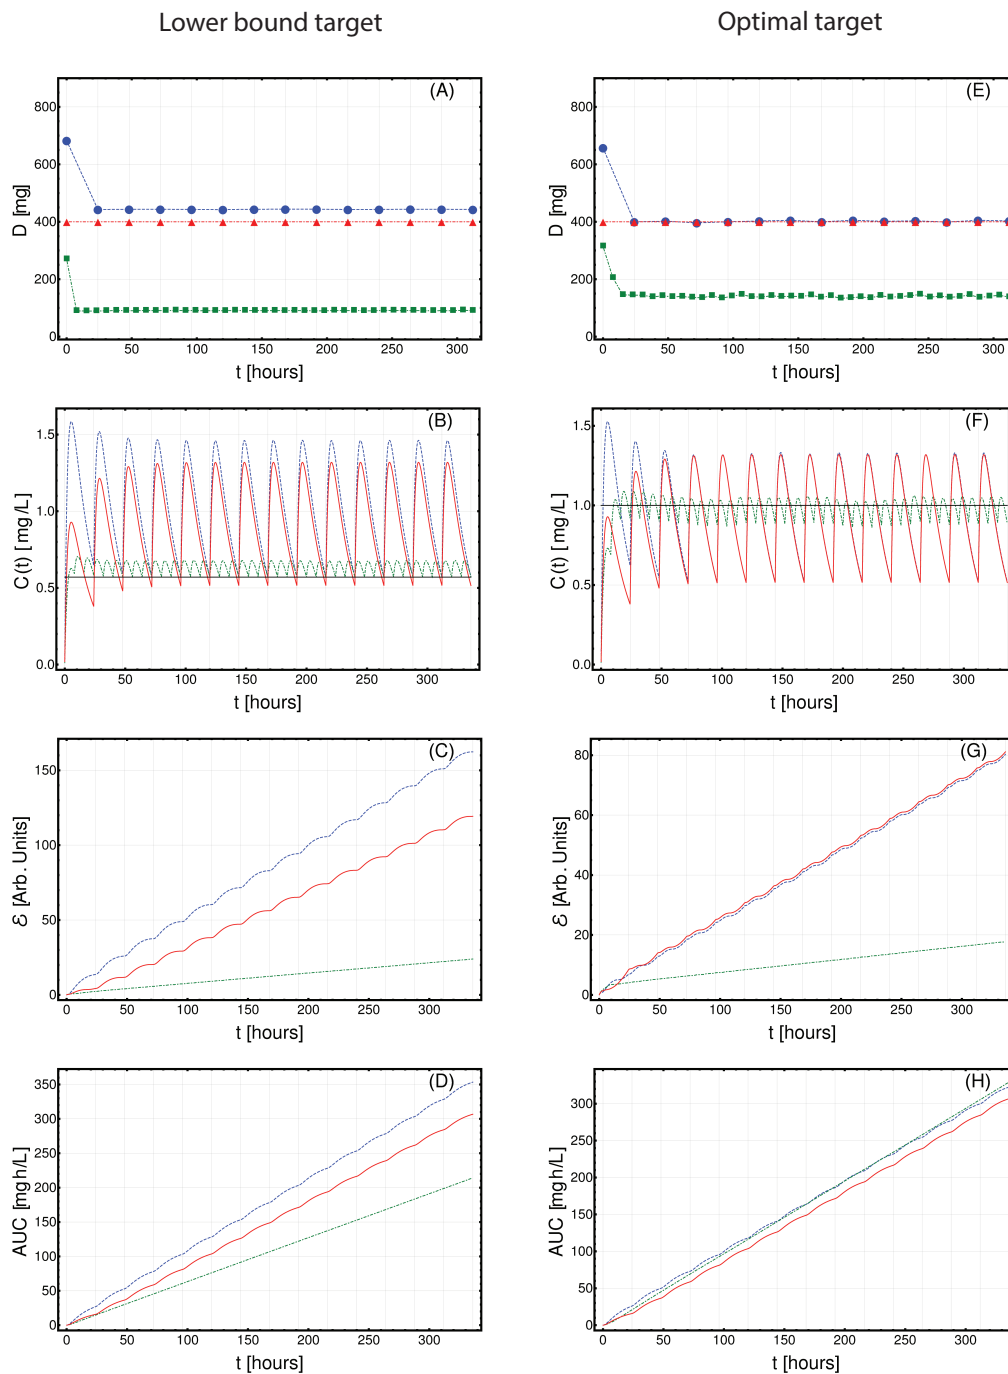

Figure S20: Optimized Imatinib administration returned by CT4TD for patient 0007 00002 DPS from (Michor et al. (2005)), in the cases of: 1-dose/day (blue) and 3-doses/day (green), with respect to: *lower-bound* target concentration  $C_{targ} = 0.57 [mg/L]$  (left panels: A–D) and *optimal* target concentration  $C_{targ} = 1 [mg/L]$  (right panels: E–H). Standard administration – i.e., 400 mg Imatinib/day – is shown with a red dashed line. In this case, the optimization of PK/PD models is obtained on patient-specific PK parameters, without considering the PD models. (A,D) Imatinib scheduled dosage in  $mg$  (y axis), displayed on 14 days (x axis). (B–E) Imatinib concentration in blood in  $[mg/L]$  (y axis). (C–F) Variation of the cumulative distance between the observed concentration and the target in time. (D–H) The AUC in  $[mg \cdot h/L]$

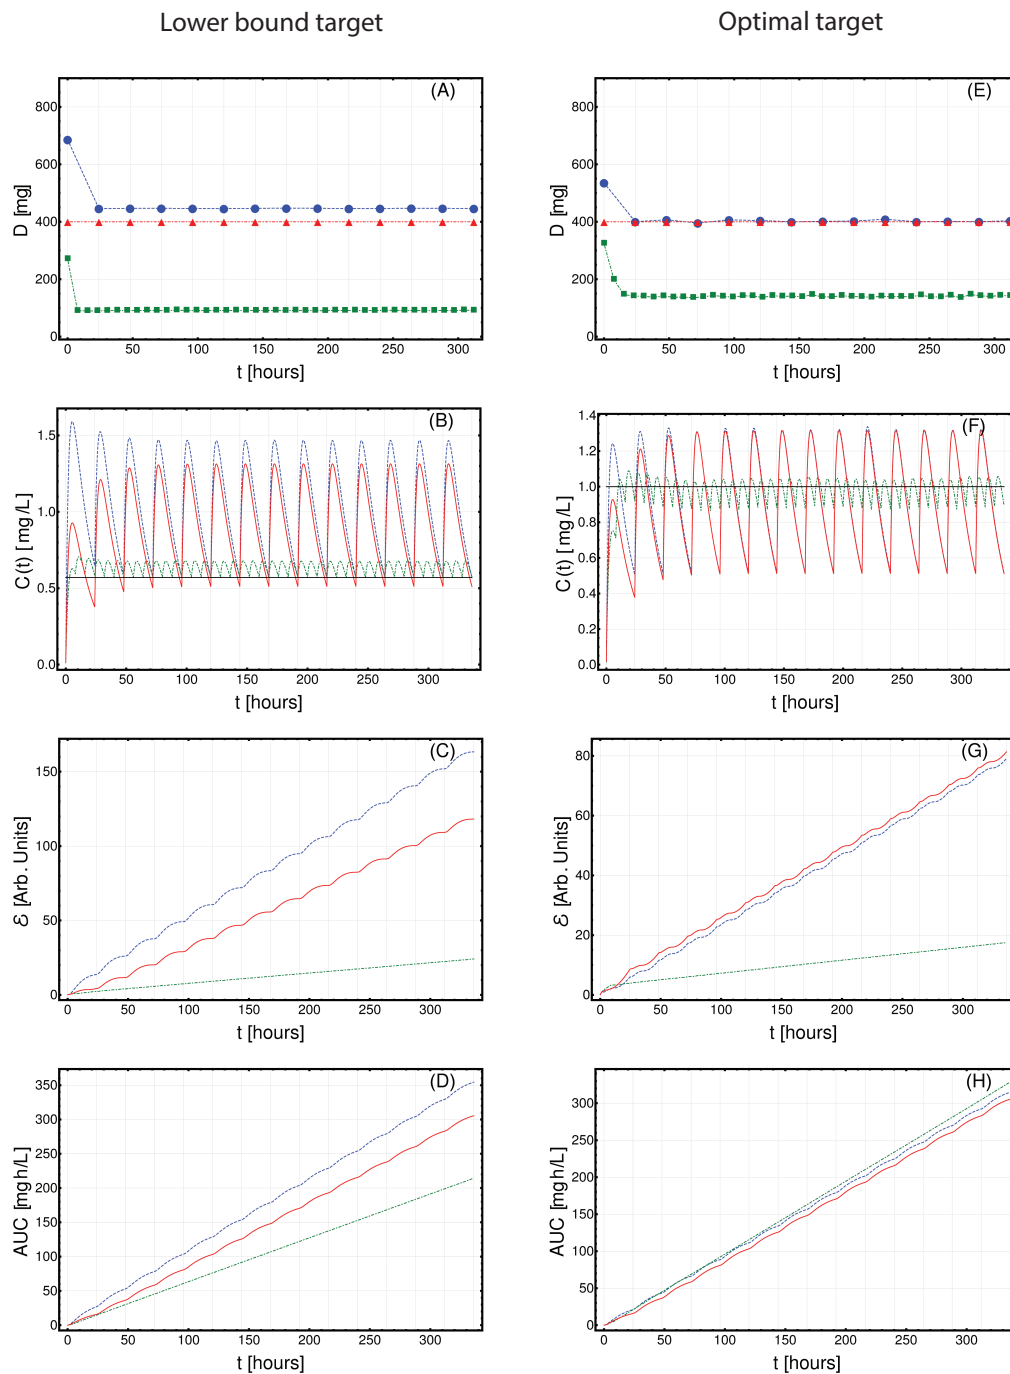

Figure S21: Optimized Imatinib administration returned by CT4TD for patient 0008 00002 PWR from (Michor et al. (2005)), in the cases of: 1-dose/day (blue) and 3-doses/day (green), with respect to: *lower-bound* target concentration  $C_{targ} = 0.57 [mg/L]$  (left panels: A–D) and *optimal* target concentration  $C_{targ} = 1 [mg/L]$  (right panels: E–H). Standard administration – i.e., 400 mg Imatinib/day – is shown with a red dashed line. In this case, the optimization of PK/PD models is obtained on patient-specific PK parameters, without considering the PD models. (A,D) Imatinib scheduled dosage in  $mg$  (y axis), displayed on 14 days (x axis). (B–E) Imatinib concentration in blood in  $[mg/L]$  (y axis). (C–F) Variation of the cumulative distance between the observed concentration and the target in time. (D–H) The AUC in  $[mg \cdot h/L]$

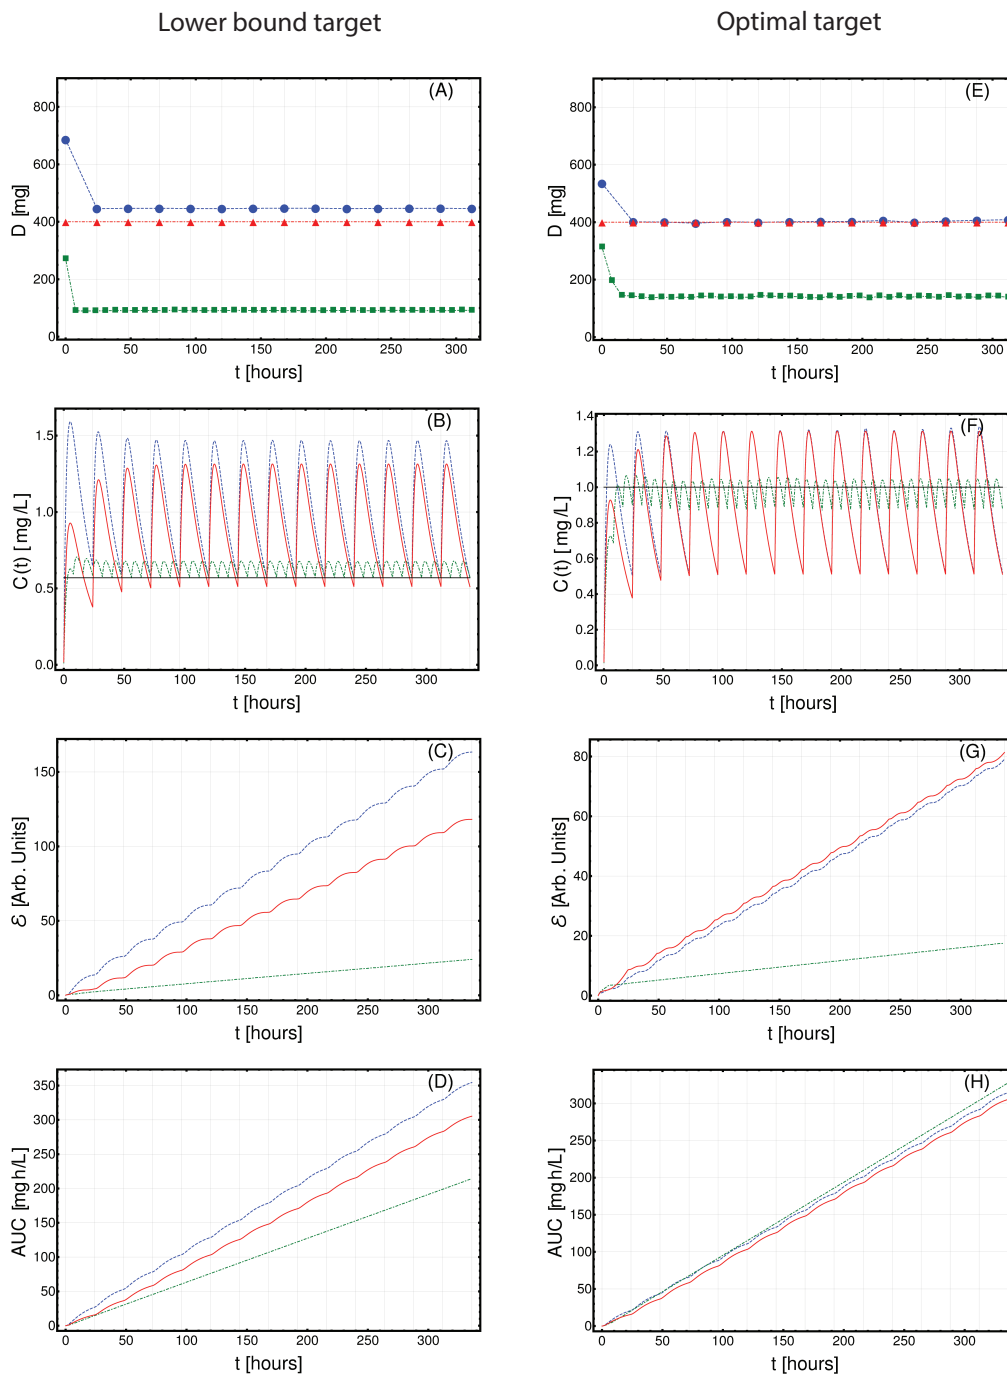

Figure S22: Optimized Imatinib administration returned by CT4TD for patient 0008 00003 LJJ from (Michor et al. (2005)), in the cases of: 1-dose/day (blue) and 3-doses/day (green), with respect to: *lower-bound* target concentration  $C_{targ} = 0.57 [mg/L]$  (left panels: A–D) and *optimal* target concentration  $C_{targ} = 1 [mg/L]$  (right panels: E–H). Standard administration – i.e., 400 mg Imatinib/day – is shown with a red dashed line. In this case, the optimization of PK/PD models is obtained on patient-specific PK parameters, without considering the PD models. (A,D) Imatinib scheduled dosage in  $mg$  (y axis), displayed on 14 days (x axis). (B–E) Imatinib concentration in blood in  $[mg/L]$  (y axis). (C–F) Variation of the cumulative distance between the observed concentration and the target in time. (D–H) The AUC in  $[mg \cdot h/L]$

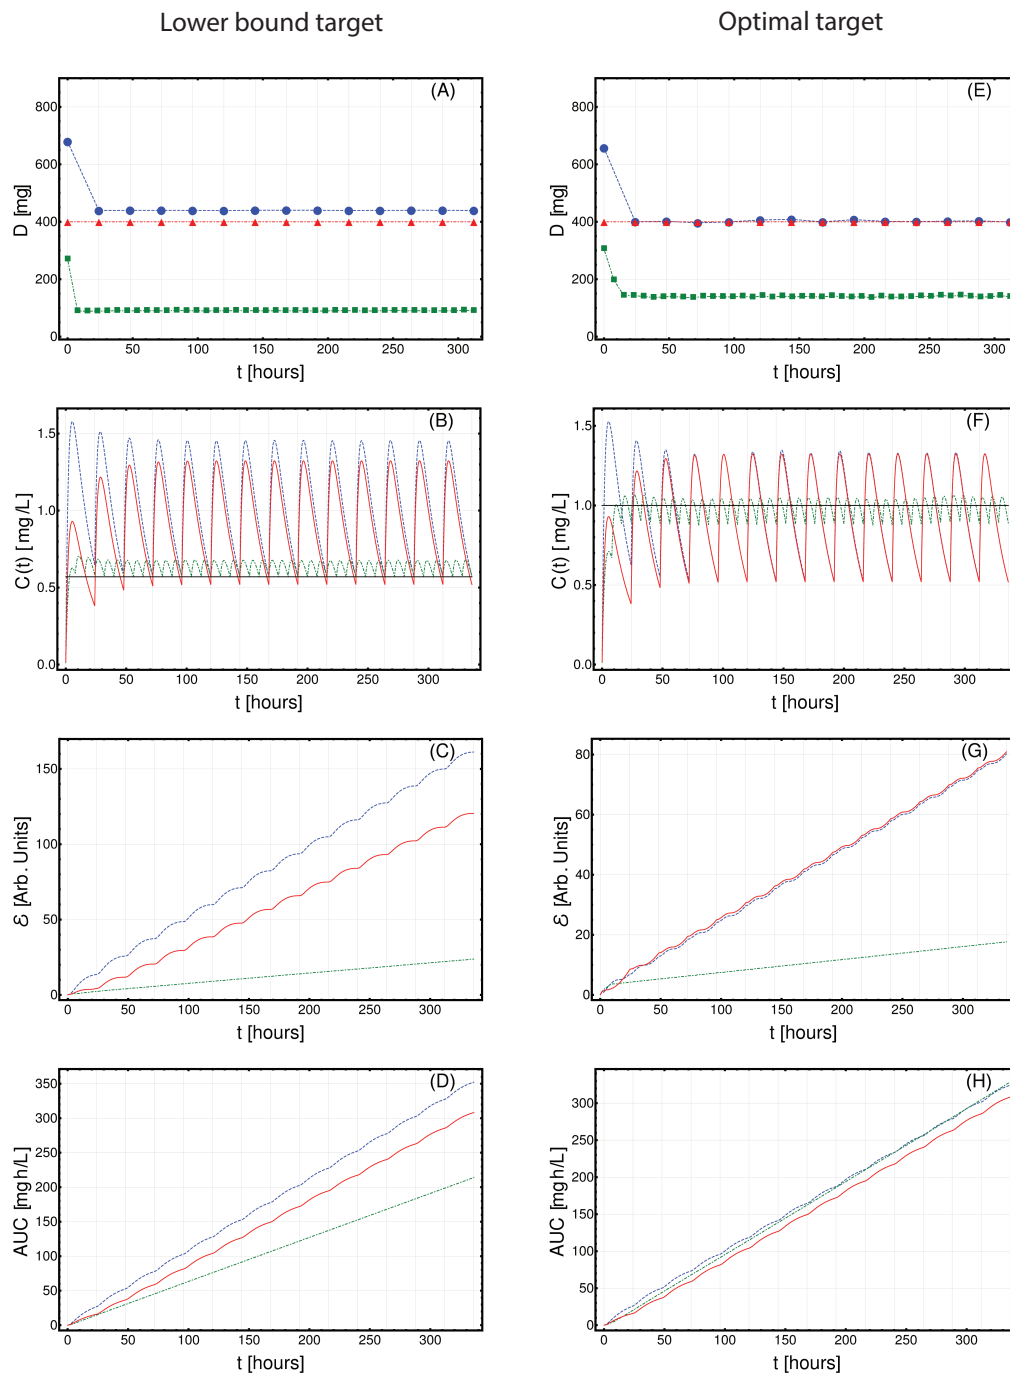

Figure S23: Optimized Imatinib administration returned by CT4TD for patient 0008 00005 BAT from (Michor et al. (2005)), in the cases of: 1-dose/day (blue) and 3-doses/day (green), with respect to: *lower-bound* target concentration  $C_{targ} = 0.57 [mg/L]$  (left panels: A–D) and *optimal* target concentration  $C_{targ} = 1 [mg/L]$  (right panels: E–H). Standard administration – i.e., 400 mg Imatinib/day – is shown with a red dashed line. In this case, the optimization of PK/PD models is obtained on patient-specific PK parameters, without considering the PD models. (A,D) Imatinib scheduled dosage in  $mg$  (y axis), displayed on 14 days (x axis). (B-E) Imatinib concentration in blood in  $[mg/L]$  (y axis). (C-F) Variation of the cumulative distance between the observed concentration and the target in time. (D-H) The AUC in  $[mg \cdot h/L]$

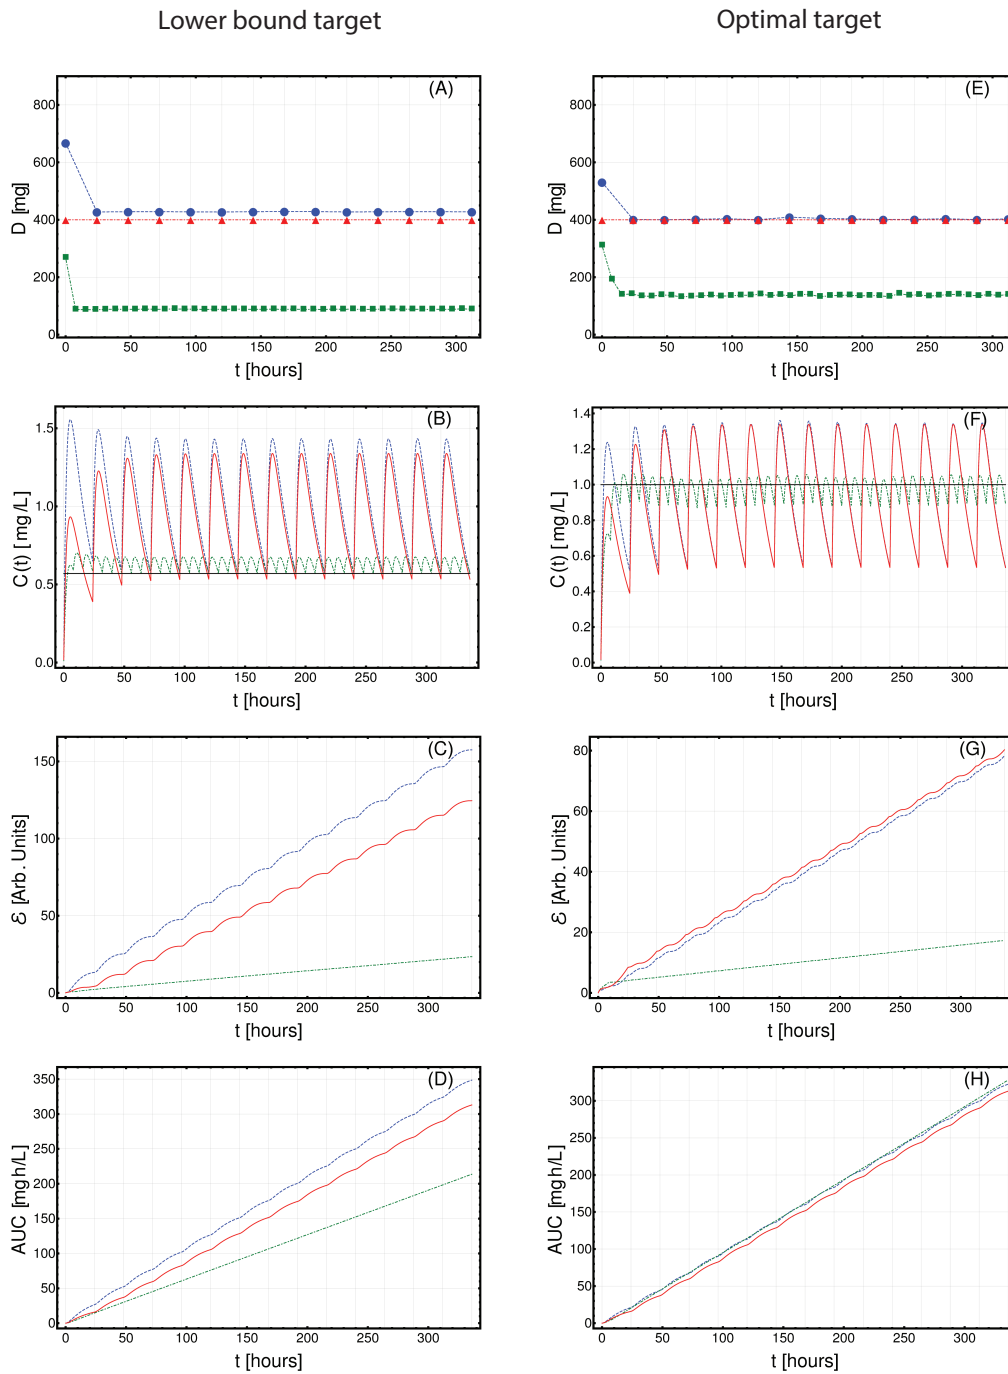

Figure S24: Optimized Imatinib administration returned by CT4TD for patient 0009 00003 LH from (Michor et al. (2005)), in the cases of: 1-dose/day (blue) and 3-doses/day (green), with respect to: *lower-bound* target concentration  $C_{targ} = 0.57 [mg/L]$  (left panels: A–D) and *optimal* target concentration  $C_{targ} = 1 [mg/L]$  (right panels: E–H). Standard administration – i.e., 400 mg Imatinib/day – is shown with a red dashed line. In this case, the optimization of PK/PD models is obtained on patient-specific PK parameters, without considering the PD models. (A,D) Imatinib scheduled dosage in  $mg$  (y axis), displayed on 14 days (x axis). (B–E) Imatinib concentration in blood in  $[mg/L]$  (y axis). (C–F) Variation of the cumulative distance between the observed concentration and the target in time. (D–H) The AUC in  $[mg \cdot h/L]$



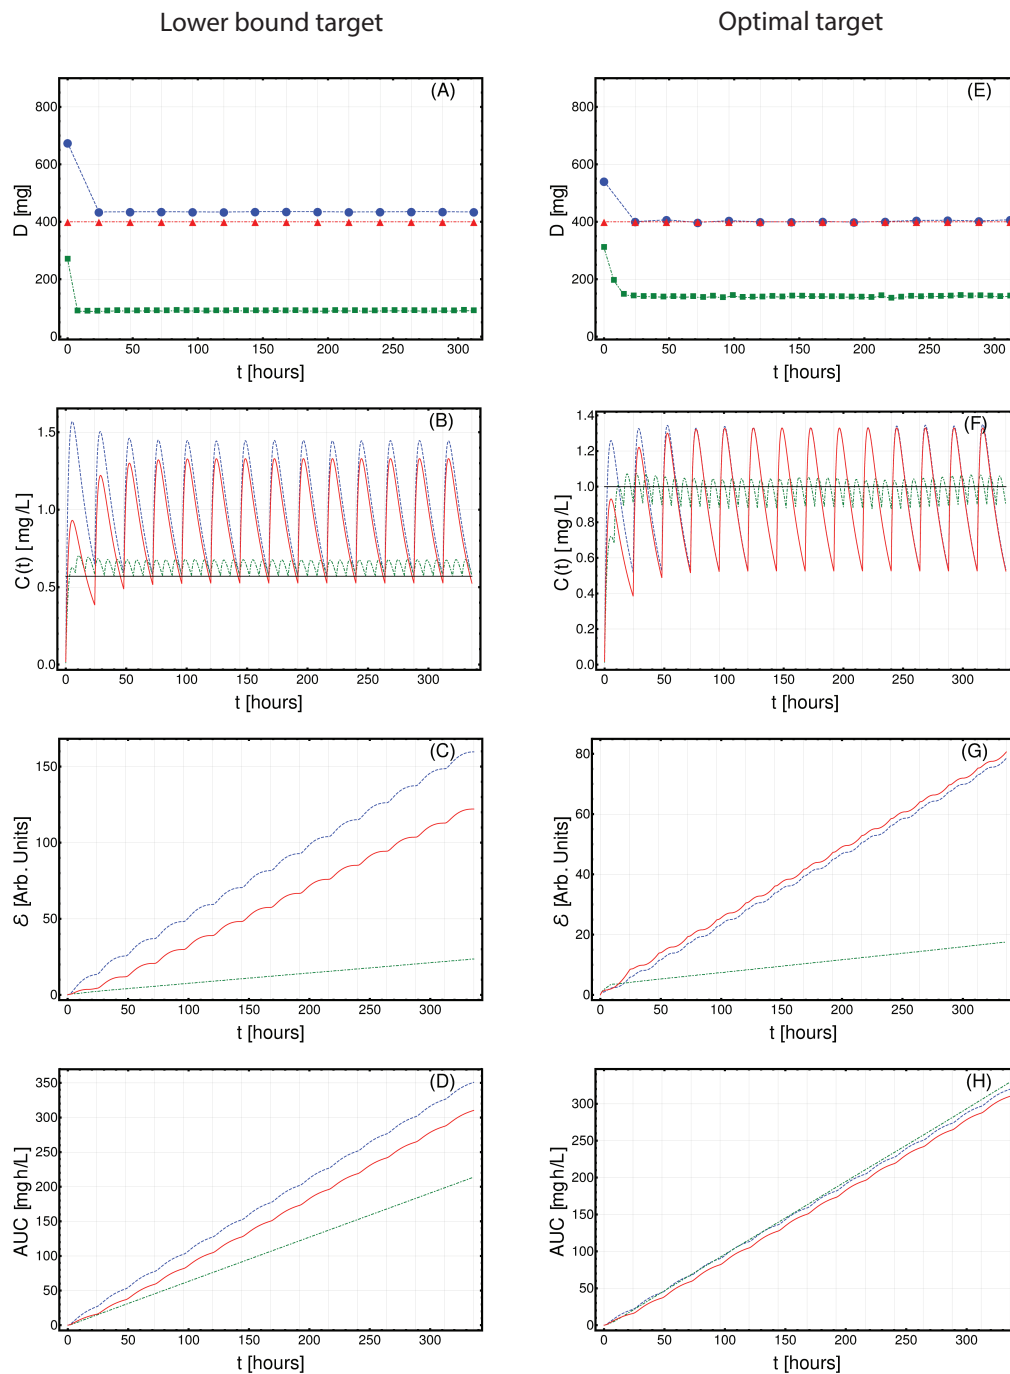

Figure S25: Optimized Imatinib administration returned by CT4TD for patient 0010 00001 HJ from (Michor et al. (2005)), in the cases of: 1-dose/day (blue) and 3-doses/day (green), with respect to: *lower-bound* target concentration  $C_{targ} = 0.57 [mg/L]$  (left panels: A–D) and *optimal* target concentration  $C_{targ} = 1 [mg/L]$  (right panels: E–H). Standard administration – i.e., 400 mg Imatinib/day – is shown with a red dashed line. In this case, the optimization of PK/PD models is obtained on patient-specific PK parameters, without considering the PD models. (A,D) Imatinib scheduled dosage in  $mg$  (y axis), displayed on 14 days (x axis). (B–E) Imatinib concentration in blood in  $[mg/L]$  (y axis). (C–F) Variation of the cumulative distance between the observed concentration and the target in time. (D–H) The AUC in  $[mg \cdot h/L]$

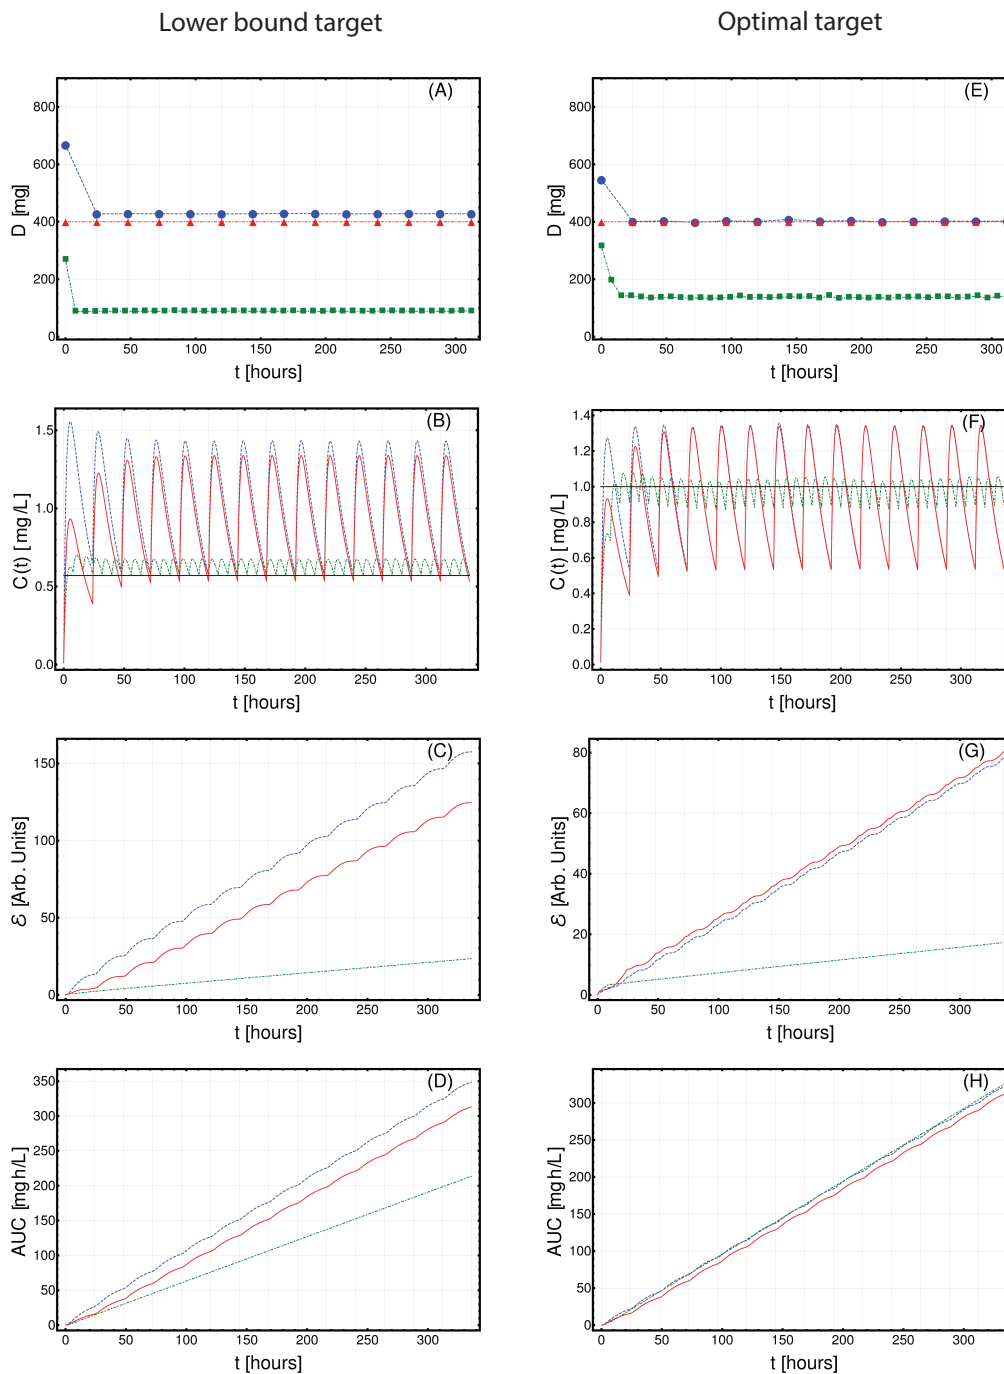

Figure S26: Optimized Imatinib administration returned by CT4TD for patient 0010 00002 GR from (Michor et al. (2005)), in the cases of: 1-dose/day (blue) and 3-doses/day (green), with respect to: *lower-bound* target concentration  $C_{targ} = 0.57 [mg/L]$  (left panels: A–D) and *optimal* target concentration  $C_{targ} = 1 [mg/L]$  (right panels: E–H). Standard administration – i.e., 400 mg Imatinib/day – is shown with a red dashed line. In this case, the optimization of PK/PD models is obtained on patient-specific PK parameters, without considering the PD models. (A,D) Imatinib scheduled dosage in  $mg$  (y axis), displayed on 14 days (x axis). (B–E) Imatinib concentration in blood in  $[mg/L]$  (y axis). (C–F) Variation of the cumulative distance between the observed concentration and the target in time. (D–H) The AUC in  $[mg \cdot h/L]$

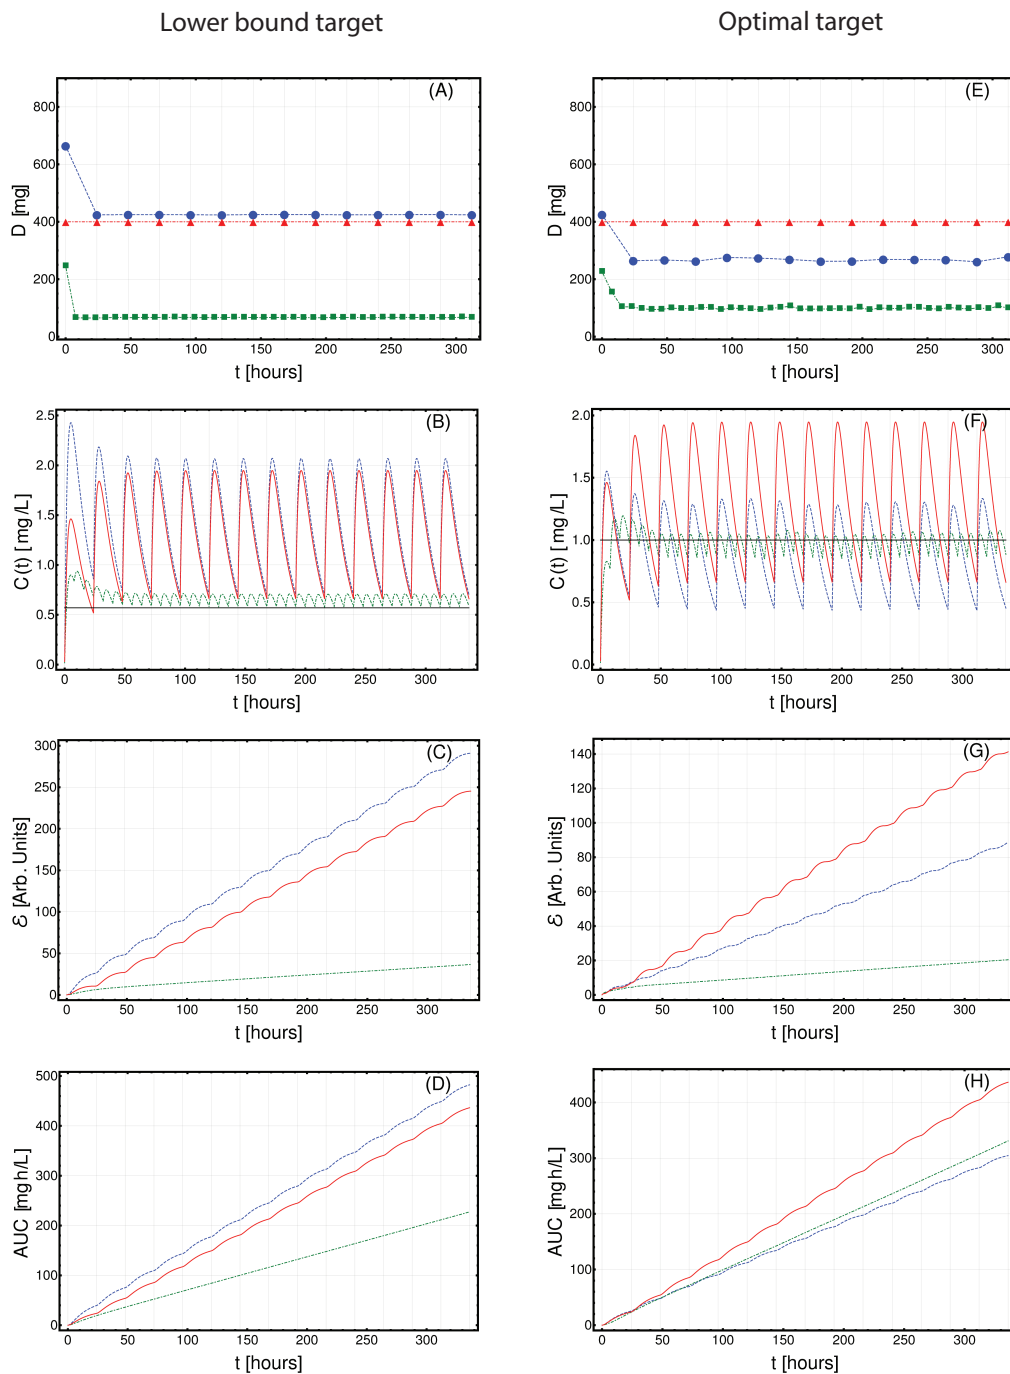

Figure S27: Optimized Imatinib administration returned by CT4TD for patient 0011 00001 CMC from (Michor et al. (2005)), in the cases of: 1-dose/day (blue) and 3-doses/day (green), with respect to: *lower-bound* target concentration  $C_{targ} = 0.57 [mg/L]$  (left panels: A–D) and *optimal* target concentration  $C_{targ} = 1 [mg/L]$  (right panels: E–H). Standard administration – i.e., 400 mg Imatinib/day – is shown with a red dashed line. In this case, the optimization of PK/PD models is obtained on patient-specific PK parameters, without considering the PD models. (A,D) Imatinib scheduled dosage in  $mg$  (y axis), displayed on 14 days (x axis). (B–E) Imatinib concentration in blood in  $[mg/L]$  (y axis). (C–F) Variation of the cumulative distance between the observed concentration and the target in time. (D–H) The AUC in  $[mg \cdot h/L]$

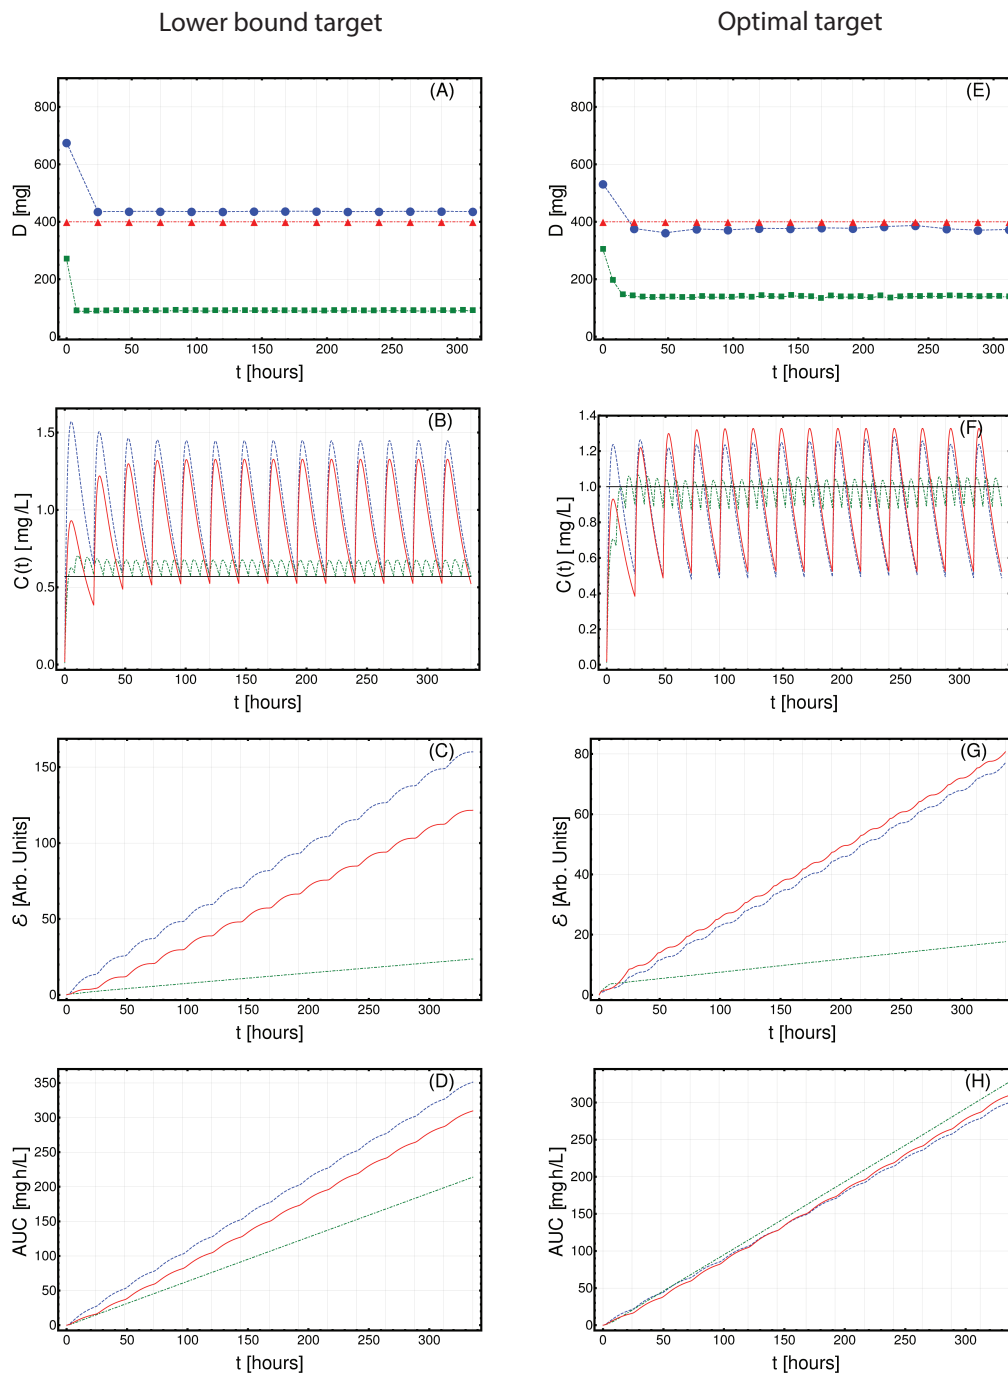

Figure S28: Optimized Imatinib administration returned by CT4TD for patient 0011 00005 SCW from (Michor et al. (2005)), in the cases of: 1-dose/day (blue) and 3-doses/day (green), with respect to: *lower-bound* target concentration  $C_{targ} = 0.57 [mg/L]$  (left panels: A–D) and *optimal* target concentration  $C_{targ} = 1 [mg/L]$  (right panels: E–H). Standard administration – i.e., 400 mg Imatinib/day – is shown with a red dashed line. In this case, the optimization of PK/PD models is obtained on patient-specific PK parameters, without considering the PD models. (A,D) Imatinib scheduled dosage in  $mg$  (y axis), displayed on 14 days (x axis). (B–E) Imatinib concentration in blood in  $[mg/L]$  (y axis). (C–F) Variation of the cumulative distance between the observed concentration and the target in time. (D–H) The AUC in  $[mg \cdot h/L]$

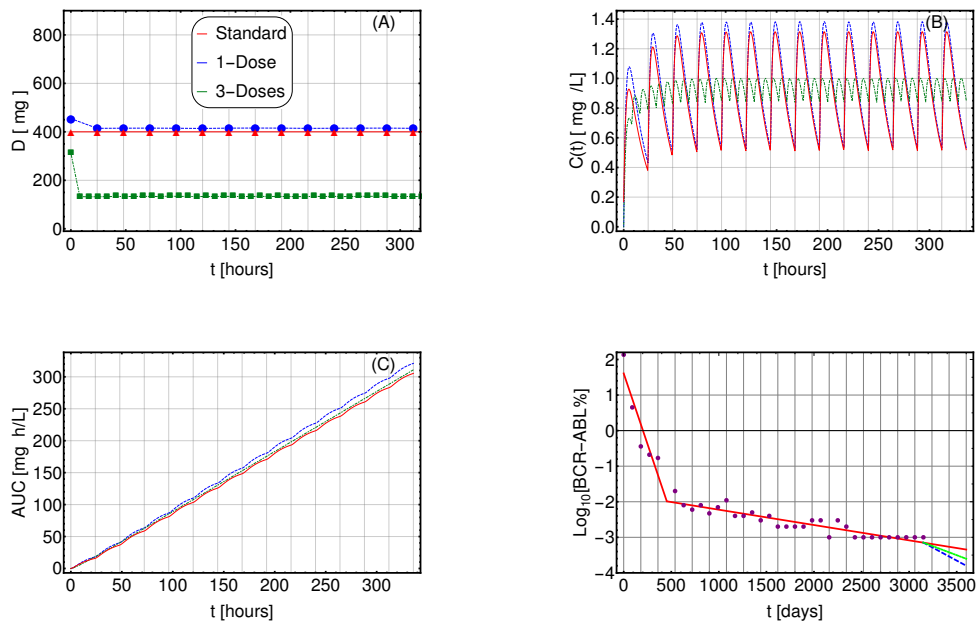

Figure S29: **Adjusting therapy for tumor burden minimization.** Imatinib administration optimized for tumor burden minimization in patient 0001 00002 RH (male) from (Michor et al. (2005)), in the cases of: 1-dose/day (purple) and 3-doses/day (green), with  $\phi = 60$ , as compared to standard administration (red). In this case, the optimization is obtained on patient-specific PK and PD models. **(A)** Imatinib scheduled dosage in  $mg$  (y axis), displayed on 14 days (x axis). **(B)** Imatinib concentration in blood in  $[mg/L]$  (y axis). **(C)** Temporal variation of the AUC in  $[mg \cdot h/L]$  (y axis). **(D)** Longitudinal data points on tumor burden recorded are presented in purple. The best fit is shown with red lines. The slope of the right-most line is used to determine the cancer stem cell death rate and, in turn, the patient-specific PD parameters. The blue (green) line represents the predicted cancer subpopulation decay in case the 1-dose (3-doses) optimal administration

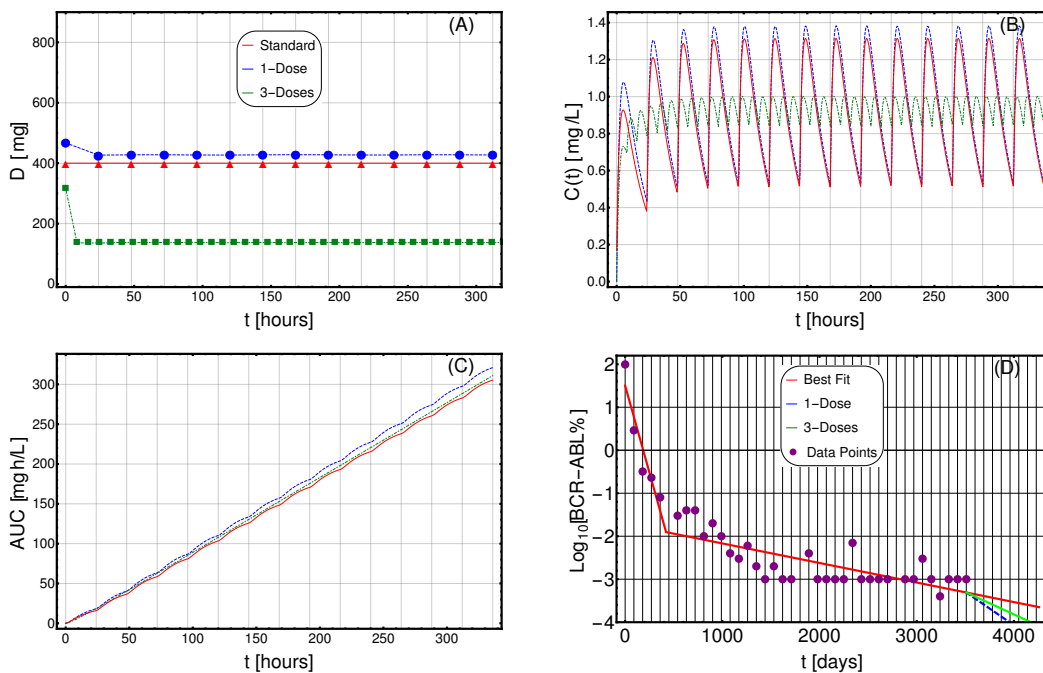

Figure S30: **Adjusting therapy for tumor burden minimization.** Imatinib administration optimized for tumor burden minimization in patient 0001 00006 GMC (male) from (Michor et al. (2005)), in the cases of: 1-dose/day (purple) and 3-doses/day (green), with  $\phi = 60$ , as compared to standard administration (red). In this case, the optimization is obtained on patient-specific PK and PD models. (A) Imatinib scheduled dosage in  $mg$  (y axis), displayed on 14 days (x axis). (B) Imatinib concentration in blood in  $[mg/L]$  (y axis). (C) Temporal variation of the AUC in  $[mg \cdot h/L]$  (y axis). (D) Longitudinal data points on tumor burden recorded are presented in purple. The best fit is shown with red lines. The slope of the right-most line is used to determine the cancer stem cell death rate and, in turn, the patient-specific PD parameters. The blue (green) line represents the predicted cancer subpopulation decay in case the 1-dose (3-doses) optimal administration

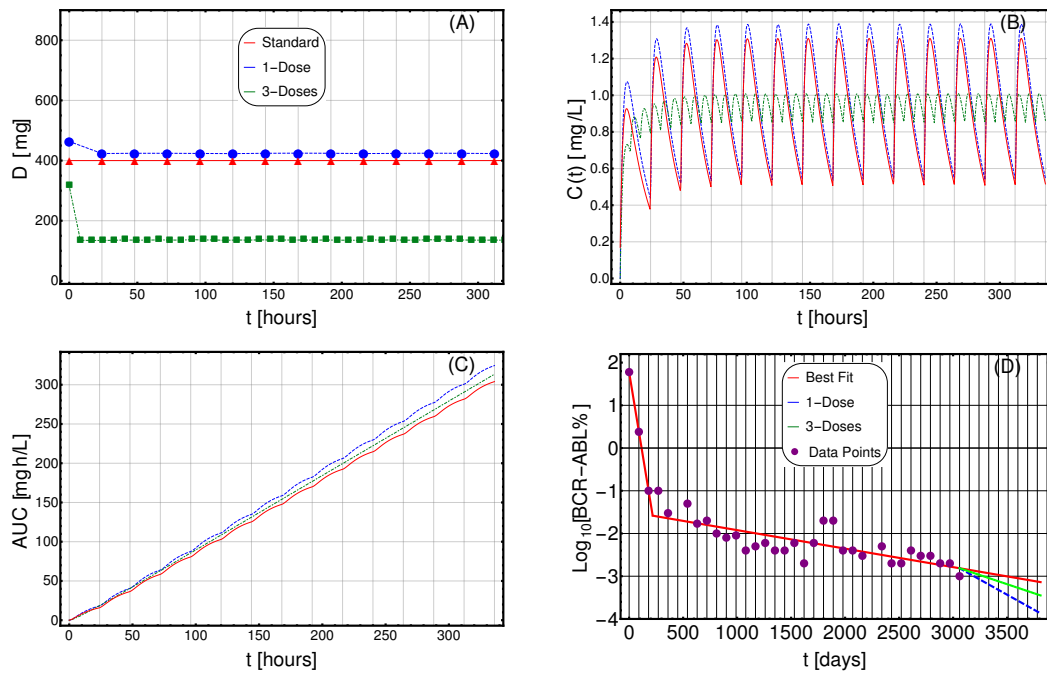

Figure S31: **Adjusting therapy for tumor burden minimization.** Imatinib administration optimized for tumor burden minimization in patient 0001 00009 MJG (male) from (Michor et al. (2005)), in the cases of: 1-dose/day (purple) and 3-doses/day (green), with  $\phi = 60$ , as compared to standard administration (red). In this case, the optimization is obtained on patient-specific PK and PD models. **(A)** Imatinib scheduled dosage in  $mg$  (y axis), displayed on 14 days (x axis). **(B)** Imatinib concentration in blood in  $[mg/L]$  (y axis). **(C)** Temporal variation of the AUC in  $[mg \cdot h/L]$  (y axis). **(D)** Longitudinal data points on tumor burden recorded are presented in purple. The best fit is shown with red lines. The slope of the right-most line is used to determine the cancer stem cell death rate and, in turn, the patient-specific PD parameters. The blue (green) line represents the predicted cancer subpopulation decay in case the 1-dose (3-doses) optimal administration

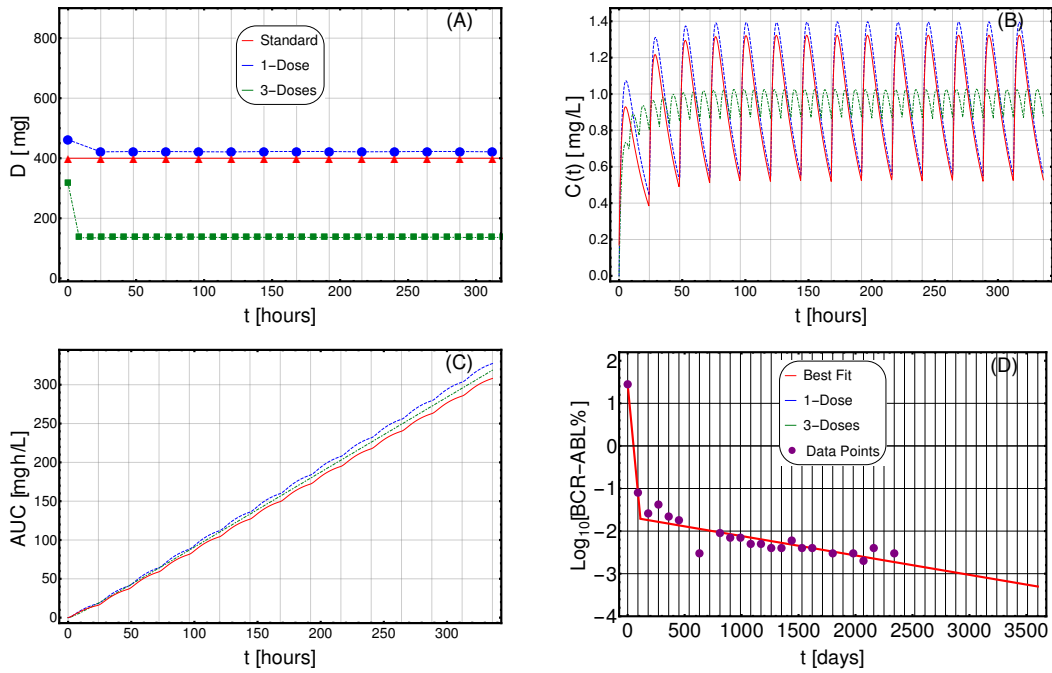

Figure S32: **Adjusting therapy for tumor burden minimization.** Imatinib administration optimized for tumor burden minimization in patient 0002 00003 SMV (male) from (Michor et al. (2005)), in the cases of: 1-dose/day (purple) and 3-doses/day (green), with  $\phi = 60$ , as compared to standard administration (red). In this case, the optimization is obtained on patient-specific PK and PD models. **(A)** Imatinib scheduled dosage in  $mg$  (y axis), displayed on 14 days (x axis). **(B)** Imatinib concentration in blood in  $[mg/L]$  (y axis). **(C)** Temporal variation of the AUC in  $[mg \cdot h/L]$  (y axis). **(D)** Longitudinal data points on tumor burden recorded are presented in purple. The best fit is shown with red lines. The slope of the right-most line is used to determine the cancer stem cell death rate and, in turn, the patient-specific PD parameters. The blue (green) line represents the predicted cancer subpopulation decay in case the 1-dose (3-doses) optimal administration



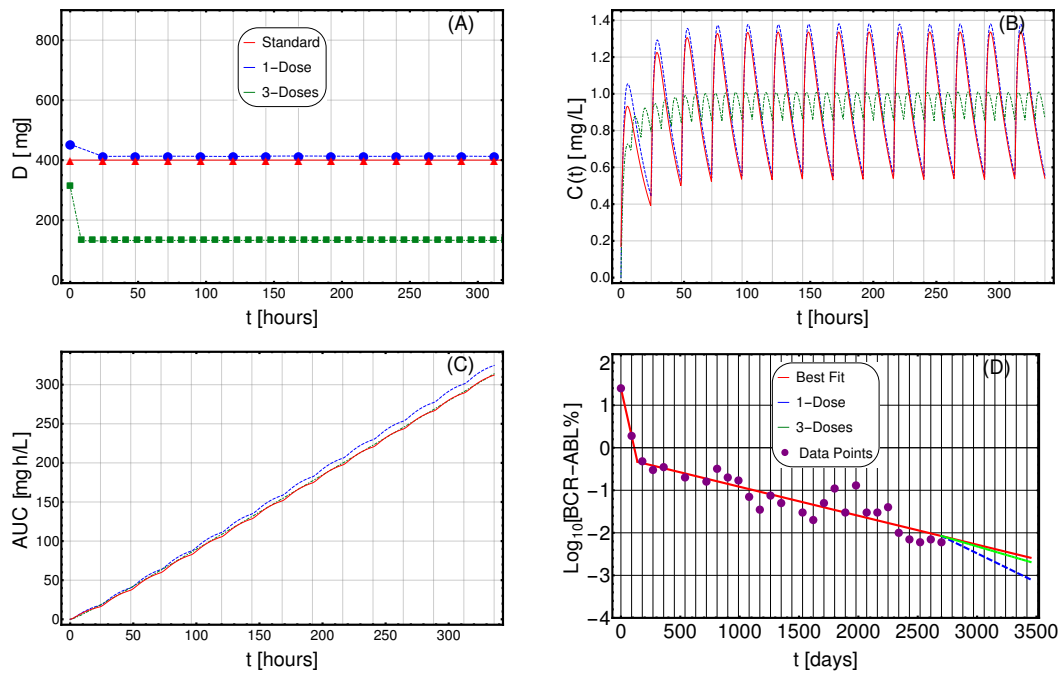

Figure S33: **Adjusting therapy for tumor burden minimization.** Imatinib administration optimized for tumor burden minimization in patient 0002 00007 PMG (male) from (Michor et al. (2005)), in the cases of: 1-dose/day (purple) and 3-doses/day (green), with  $\phi = 60$ , as compared to standard administration (red). In this case, the optimization is obtained on patient-specific PK and PD models. **(A)** Imatinib scheduled dosage in  $mg$  (y axis), displayed on 14 days (x axis). **(B)** Imatinib concentration in blood in  $[mg/L]$  (y axis). **(C)** Temporal variation of the AUC in  $[mg \cdot h/L]$  (y axis). **(D)** Longitudinal data points on tumor burden recorded are presented in purple. The best fit is shown with red lines. The slope of the right-most line is used to determine the cancer stem cell death rate and, in turn, the patient-specific PD parameters. The blue (green) line represents the predicted cancer subpopulation decay in case the 1-dose (3-doses) optimal administration

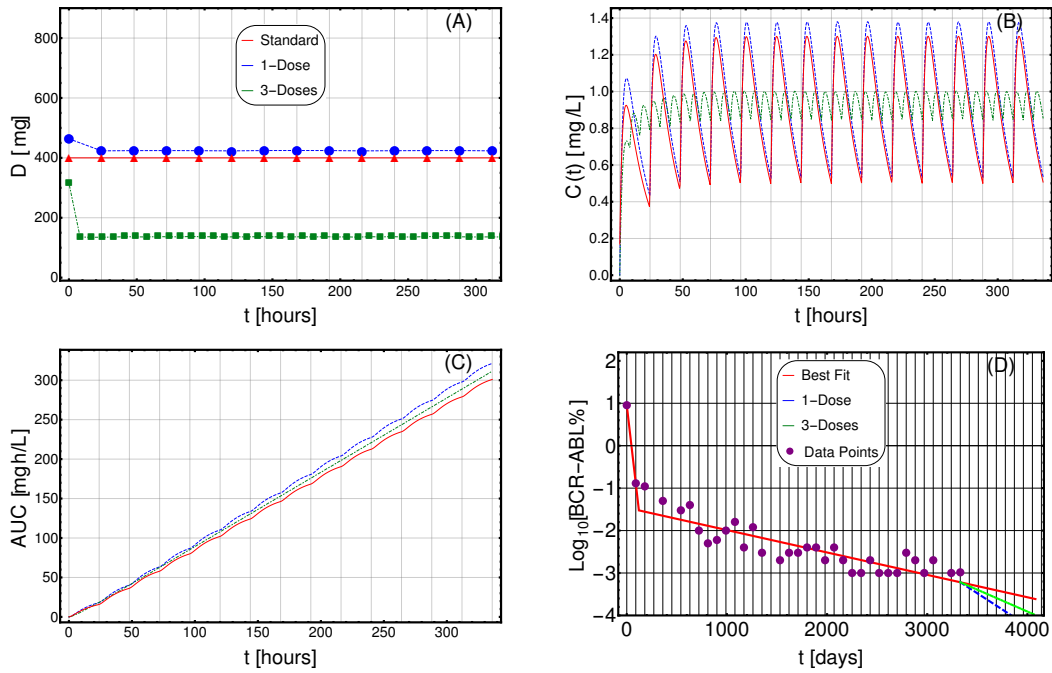

Figure S34: **Adjusting therapy for tumor burden minimization.** Imatinib administration optimized for tumor burden minimization in patient 0002 00008 SAT (male) from (Michor et al. (2005)), in the cases of: 1-dose/day (purple) and 3-doses/day (green), with  $\phi = 60$ , as compared to standard administration (red). In this case, the optimization is obtained on patient-specific PK and PD models. **(A)** Imatinib scheduled dosage in  $mg$  (y axis), displayed on 14 days (x axis). **(B)** Imatinib concentration in blood in  $[mg/L]$  (y axis). **(C)** Temporal variation of the AUC in  $[mg \cdot h/L]$  (y axis). **(D)** Longitudinal data points on tumor burden recorded are presented in purple. The best fit is shown with red lines. The slope of the right-most line is used to determine the cancer stem cell death rate and, in turn, the patient-specific PD parameters. The blue (green) line represents the predicted cancer subpopulation decay in case the 1-dose (3-doses) optimal administration

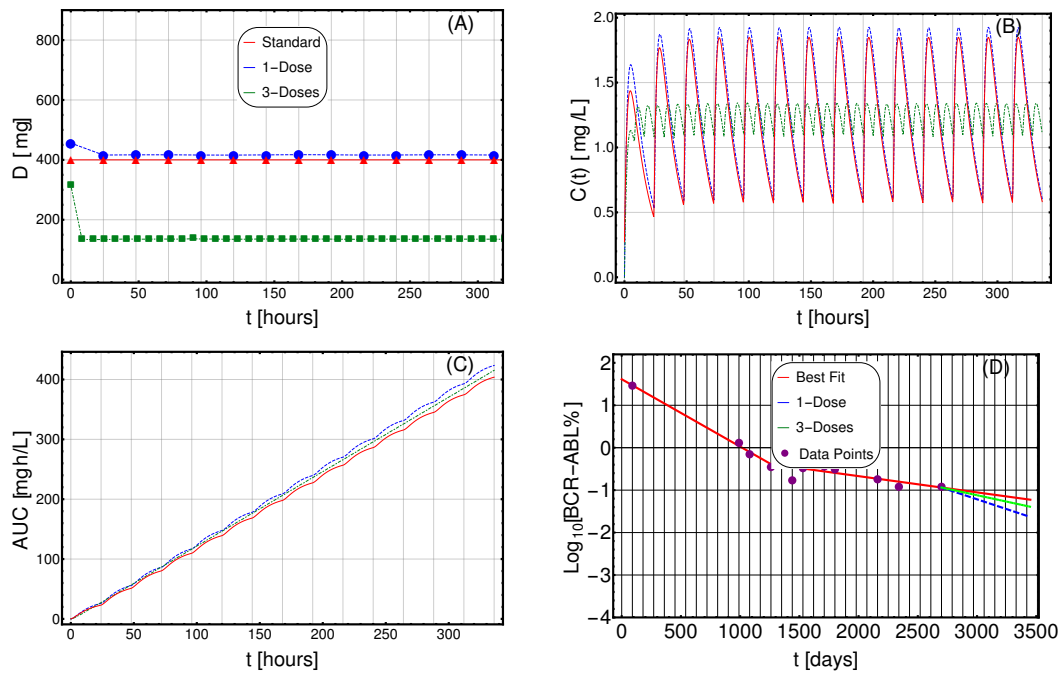

Figure S35: **Adjusting therapy for tumor burden minimization.** Imatinib administration optimized for tumor burden minimization in patient 0002 00008 CL (female) from (Michor et al. (2005)), in the cases of: 1-dose/day (purple) and 3-doses/day (green), with  $\phi = 75$ , as compared to standard administration (red). In this case, the optimization is obtained on patient-specific PK and PD models. **(A)** Imatinib scheduled dosage in  $mg$  (y axis), displayed on 14 days (x axis). **(B)** Imatinib concentration in blood in  $[mg/L]$  (y axis). **(C)** Temporal variation of the AUC in  $[mg \cdot h/L]$  (y axis). **(D)** Longitudinal data points on tumor burden recorded are presented in purple. The best fit is shown with red lines. The slope of the right-most line is used to determine the cancer stem cell death rate and, in turn, the patient-specific PD parameters. The blue (green) line represents the predicted cancer subpopulation decay in case the 1-dose (3-doses) optimal administration

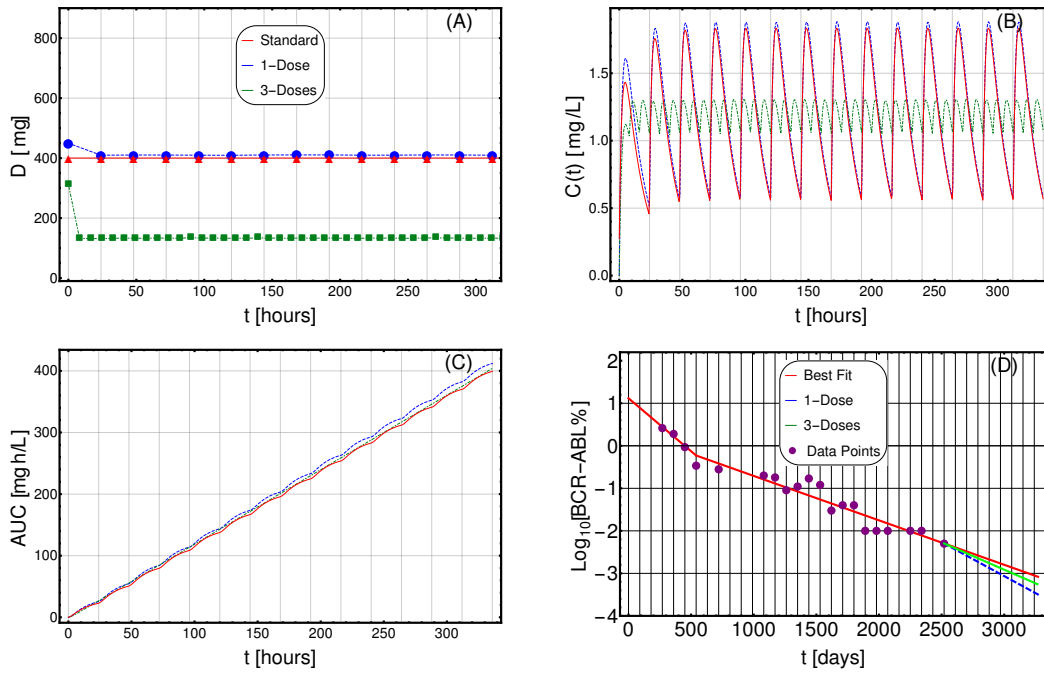

Figure S36: **Adjusting therapy for tumor burden minimization.** Imatinib administration optimized for tumor burden minimization in patient 0004 00003 CAR (male) from (Michor et al. (2005)), in the cases of: 1-dose/day (purple) and 3-doses/day (green), with  $\phi = 75$ , as compared to standard administration (red). In this case, the optimization is obtained on patient-specific PK and PD models. **(A)** Imatinib scheduled dosage in  $mg$  (y axis), displayed on 14 days (x axis). **(B)** Imatinib concentration in blood in  $[mg/L]$  (y axis). **(C)** Temporal variation of the AUC in  $[mg \cdot h/L]$  (y axis). **(D)** Longitudinal data points on tumor burden recorded are presented in purple. The best fit is shown with red lines. The slope of the right-most line is used to determine the cancer stem cell death rate and, in turn, the patient-specific PD parameters. The blue (green) line represents the predicted cancer subpopulation decay in case the 1-dose (3-doses) optimal administration

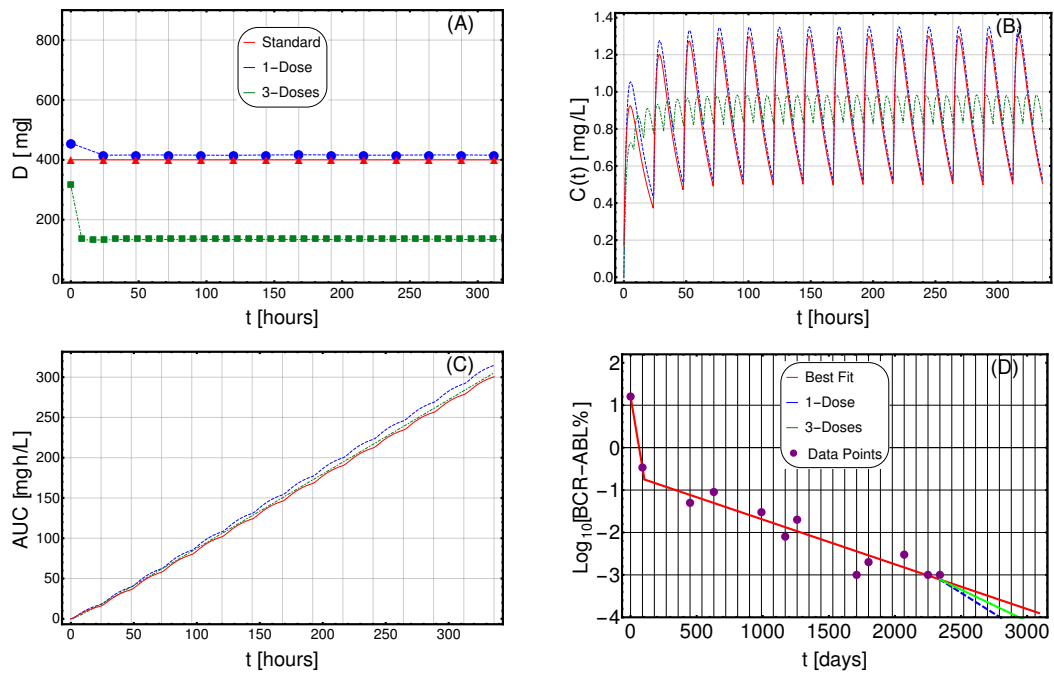

Figure S37: **Adjusting therapy for tumor burden minimization.** Imatinib administration optimized for tumor burden minimization in patient 0004 00006 GM (male) from (Michor et al. (2005)), in the cases of: 1-dose/day (purple) and 3-doses/day (green), with  $\phi = 60$ , as compared to standard administration (red). In this case, the optimization is obtained on patient-specific PK and PD models. **(A)** Imatinib scheduled dosage in  $mg$  (y axis), displayed on 14 days (x axis). **(B)** Imatinib concentration in blood in  $[mg/L]$  (y axis). **(C)** Temporal variation of the AUC in  $[mg \cdot h/L]$  (y axis). **(D)** Longitudinal data points on tumor burden recorded are presented in purple. The best fit is shown with red lines. The slope of the right-most line is used to determine the cancer stem cell death rate and, in turn, the patient-specific PD parameters. The blue (green) line represents the predicted cancer subpopulation decay in case the 1-dose (3-doses) optimal administration

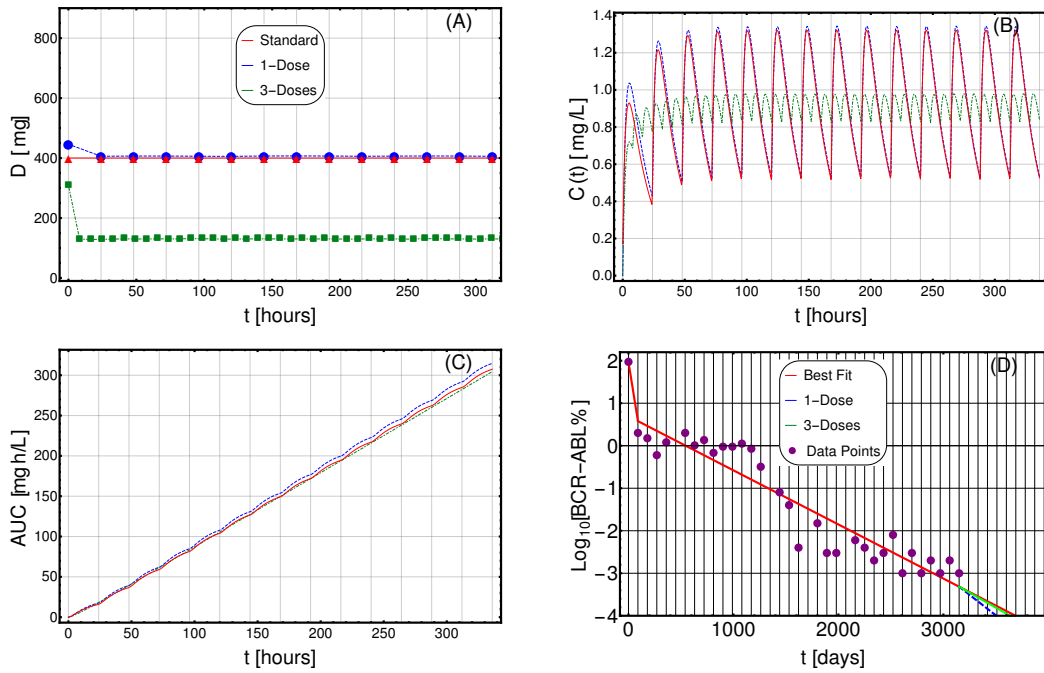

Figure S38: **Adjusting therapy for tumor burden minimization.** Imatinib administration optimized for tumor burden minimization in patient 0006 00006 ML (male) from (Michor et al. (2005)), in the cases of: 1-dose/day (purple) and 3-doses/day (green), with  $\phi = 60$ , as compared to standard administration (red). In this case, the optimization is obtained on patient-specific PK and PD models. **(A)** Imatinib scheduled dosage in  $mg$  (y axis), displayed on 14 days (x axis). **(B)** Imatinib concentration in blood in  $[mg/L]$  (y axis). **(C)** Temporal variation of the AUC in  $[mg \cdot h/L]$  (y axis). **(D)** Longitudinal data points on tumor burden recorded are presented in purple. The best fit is shown with red lines. The slope of the right-most line is used to determine the cancer stem cell death rate and, in turn, the patient-specific PD parameters. The blue (green) line represents the predicted cancer subpopulation decay in case the 1-dose (3-doses) optimal administration

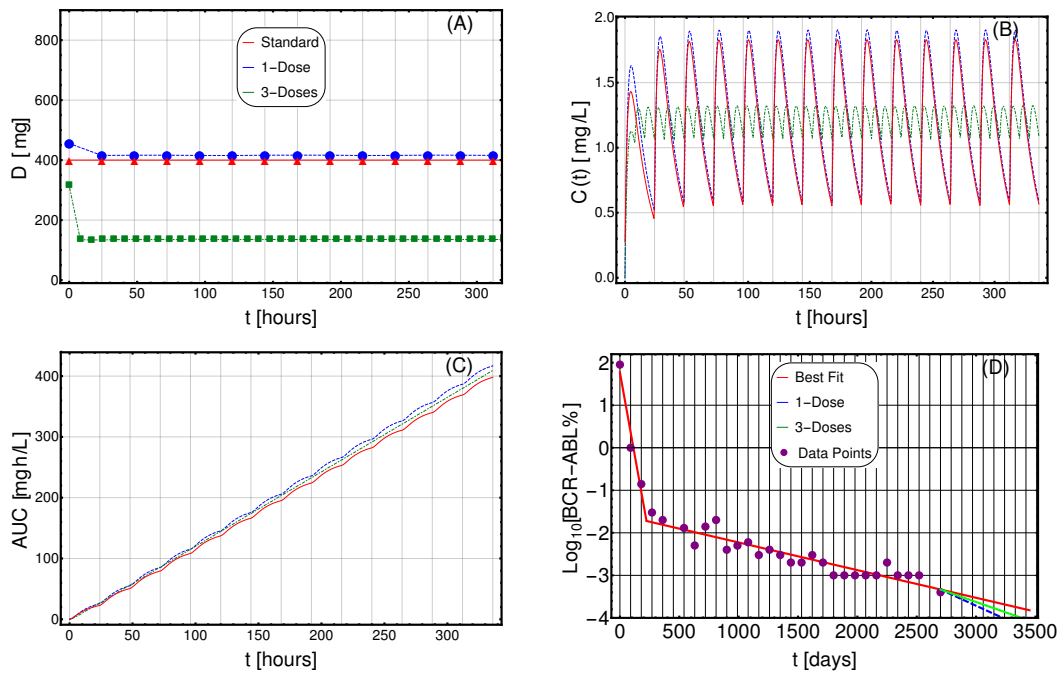

Figure S39: **Adjusting therapy for tumor burden minimization.** Imatinib administration optimized for tumor burden minimization in patient 0006 00007 RJW (female) from (Michor et al. (2005)), in the cases of: 1-dose/day (purple) and 3-doses/day (green), with  $\phi = 75$ , as compared to standard administration (red). In this case, the optimization is obtained on patient-specific PK and PD models. **(A)** Imatinib scheduled dosage in  $mg$  (y axis), displayed on 14 days (x axis). **(B)** Imatinib concentration in blood in  $[mg/L]$  (y axis). **(C)** Temporal variation of the AUC in  $[mg \cdot h/L]$  (y axis). **(D)** Longitudinal data points on tumor burden recorded are presented in purple. The best fit is shown with red lines. The slope of the right-most line is used to determine the cancer stem cell death rate and, in turn, the patient-specific PD parameters. The blue (green) line represents the predicted cancer subpopulation decay in case the 1-dose (3-doses) optimal administration

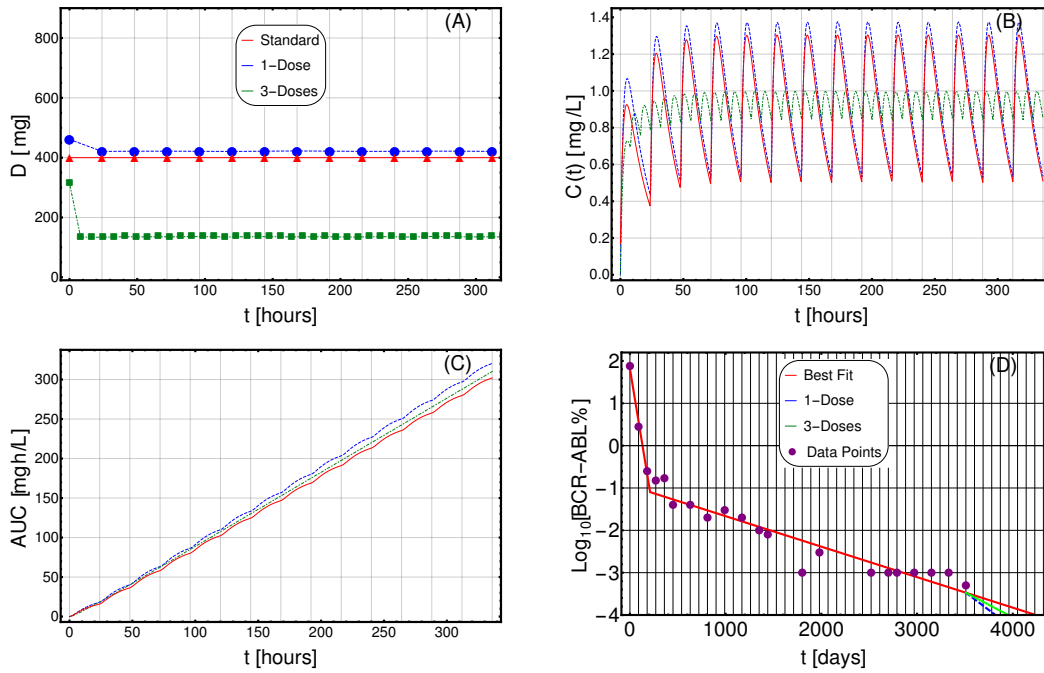

Figure S40: **Adjusting therapy for tumor burden minimization.** Imatinib administration optimized for tumor burden minimization in patient 0007 00001 AJV (male) from (Michor et al. (2005)), in the cases of: 1-dose/day (purple) and 3-doses/day (green), with  $\phi = 60$ , as compared to standard administration (red). In this case, the optimization is obtained on patient-specific PK and PD models. **(A)** Imatinib scheduled dosage in  $mg$  (y axis), displayed on 14 days (x axis). **(B)** Imatinib concentration in blood in  $[mg/L]$  (y axis). **(C)** Temporal variation of the AUC in  $[mg \cdot h/L]$  (y axis). **(D)** Longitudinal data points on tumor burden recorded are presented in purple. The best fit is shown with red lines. The slope of the right-most line is used to determine the cancer stem cell death rate and, in turn, the patient-specific PD parameters. The blue (green) line represents the predicted cancer subpopulation decay in case the 1-dose (3-doses) optimal administration



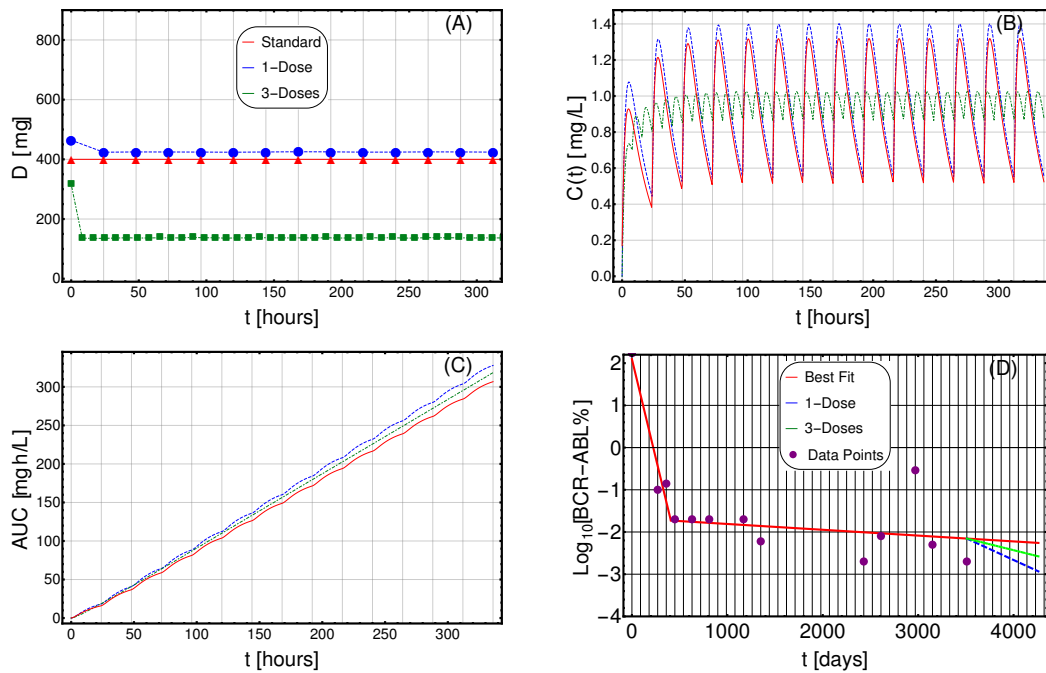

Figure S41: **Adjusting therapy for tumor burden minimization.** Imatinib administration optimized for tumor burden minimization in patient 0007 00002 DPS (male) from (Michor et al. (2005)), in the cases of: 1-dose/day (purple) and 3-doses/day (green), with  $\phi = 60$ , as compared to standard administration (red). In this case, the optimization is obtained on patient-specific PK and PD models. **(A)** Imatinib scheduled dosage in  $mg$  (y axis), displayed on 14 days (x axis). **(B)** Imatinib concentration in blood in  $[mg/L]$  (y axis). **(C)** Temporal variation of the AUC in  $[mg \cdot h/L]$  (y axis). **(D)** Longitudinal data points on tumor burden recorded are presented in purple. The best fit is shown with red lines. The slope of the right-most line is used to determine the cancer stem cell death rate and, in turn, the patient-specific PD parameters. The blue (green) line represents the predicted cancer subpopulation decay in case the 1-dose (3-doses) optimal administration

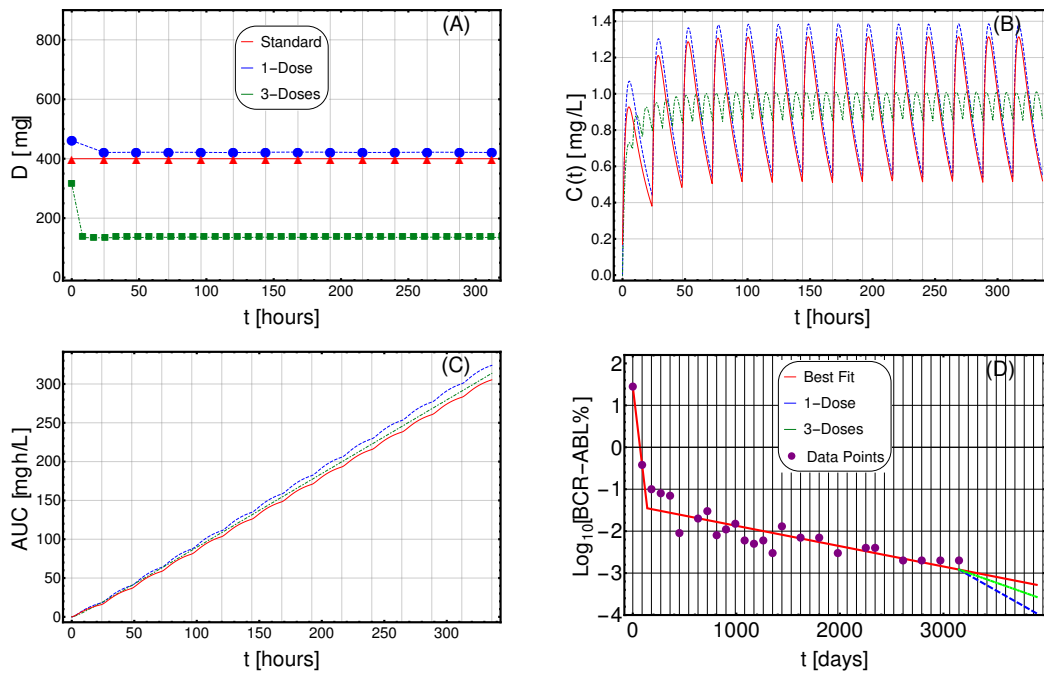

Figure S42: **Adjusting therapy for tumor burden minimization.** Imatinib administration optimized for tumor burden minimization in patient 0008 00002 PWR (male) from (Michor et al. (2005)), in the cases of: 1-dose/day (purple) and 3-doses/day (green), with  $\phi = 60$ , as compared to standard administration (red). In this case, the optimization is obtained on patient-specific PK and PD models. (A) Imatinib scheduled dosage in  $mg$  (y axis), displayed on 14 days (x axis). (B) Imatinib concentration in blood in  $[mg/L]$  (y axis). (C) Temporal variation of the AUC in  $[mg \cdot h/L]$  (y axis). (D) Longitudinal data points on tumor burden recorded are presented in purple. The best fit is shown with red lines. The slope of the right-most line is used to determine the cancer stem cell death rate and, in turn, the patient-specific PD parameters. The blue (green) line represents the predicted cancer subpopulation decay in case the 1-dose (3-doses) optimal administration

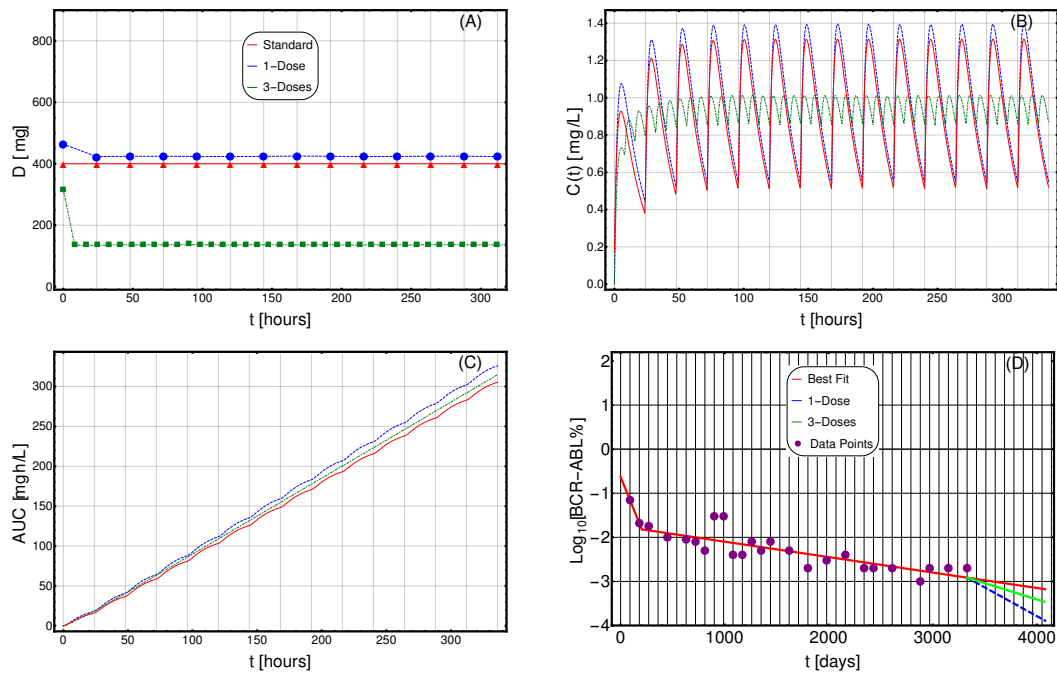

Figure S43: **Adjusting therapy for tumor burden minimization.** Imatinib administration optimized for tumor burden minimization in patient 0008 00003 LJG (male) from (Michor et al. (2005)), in the cases of: 1-dose/day (purple) and 3-doses/day (green), with  $\phi = 60$ , as compared to standard administration (red). In this case, the optimization is obtained on patient-specific PK and PD models. **(A)** Imatinib scheduled dosage in  $mg$  (y axis), displayed on 14 days (x axis). **(B)** Imatinib concentration in blood in  $[mg/L]$  (y axis). **(C)** Temporal variation of the AUC in  $[mg \cdot h/L]$  (y axis). **(D)** Longitudinal data points on tumor burden recorded are presented in purple. The best fit is shown with red lines. The slope of the right-most line is used to determine the cancer stem cell death rate and, in turn, the patient-specific PD parameters. The blue (green) line represents the predicted cancer subpopulation decay in case the 1-dose (3-doses) optimal administration

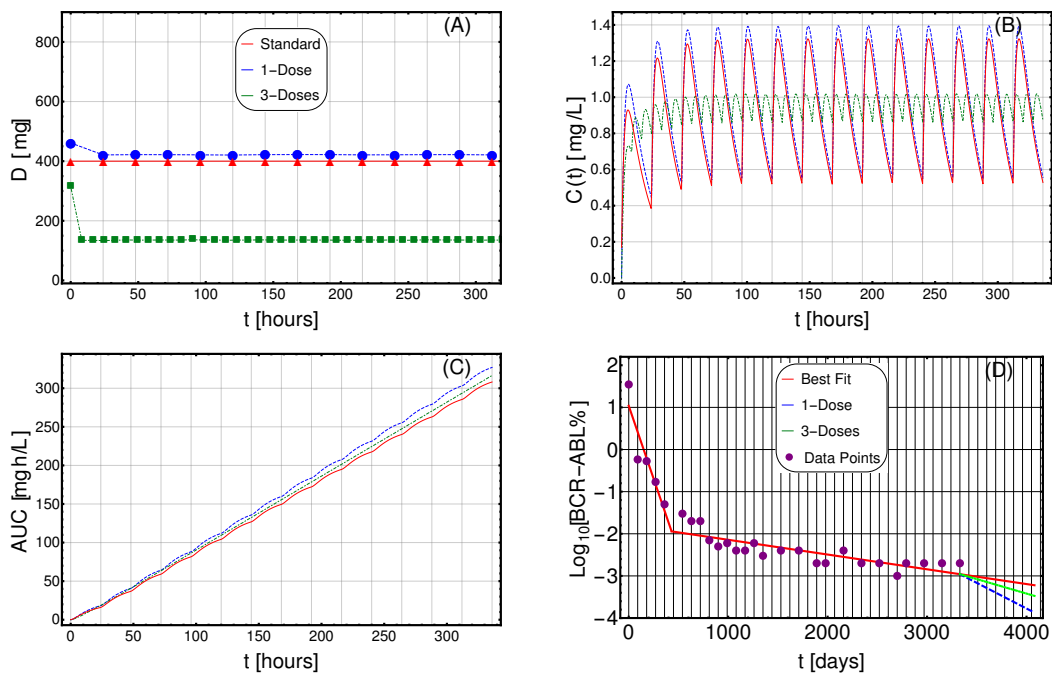

Figure S44: **Adjusting therapy for tumor burden minimization.** Imatinib administration optimized for tumor burden minimization in patient 0008 00005 BAT (male) from (Michor et al. (2005)), in the cases of: 1-dose/day (purple) and 3-doses/day (green), with  $\phi = 60$ , as compared to standard administration (red). In this case, the optimization is obtained on patient-specific PK and PD models. **(A)** Imatinib scheduled dosage in  $mg$  (y axis), displayed on 14 days (x axis). **(B)** Imatinib concentration in blood in  $[mg/L]$  (y axis). **(C)** Temporal variation of the AUC in  $[mg \cdot h/L]$  (y axis). **(D)** Longitudinal data points on tumor burden recorded are presented in purple. The best fit is shown with red lines. The slope of the right-most line is used to determine the cancer stem cell death rate and, in turn, the patient-specific PD parameters. The blue (green) line represents the predicted cancer subpopulation decay in case the 1-dose (3-doses) optimal administration

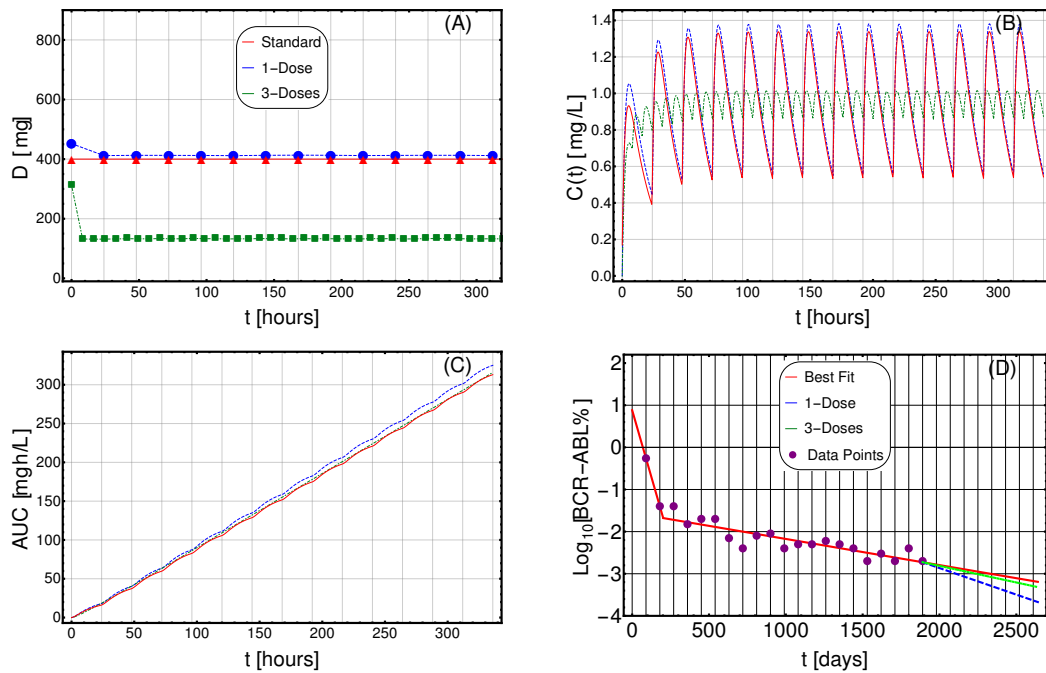

Figure S45: **Adjusting therapy for tumor burden minimization.** Imatinib administration optimized for tumor burden minimization in patient 0009 00003 LH (male) from (Michor et al. (2005)), in the cases of: 1-dose/day (purple) and 3-doses/day (green), with  $\phi = 60$ , as compared to standard administration (red). In this case, the optimization is obtained on patient-specific PK and PD models. **(A)** Imatinib scheduled dosage in  $mg$  (y axis), displayed on 14 days (x axis). **(B)** Imatinib concentration in blood in  $[mg/L]$  (y axis). **(C)** Temporal variation of the AUC in  $[mg \cdot h/L]$  (y axis). **(D)** Longitudinal data points on tumor burden recorded are presented in purple. The best fit is shown with red lines. The slope of the right-most line is used to determine the cancer stem cell death rate and, in turn, the patient-specific PD parameters. The blue (green) line represents the predicted cancer subpopulation decay in case the 1-dose (3-doses) optimal administration

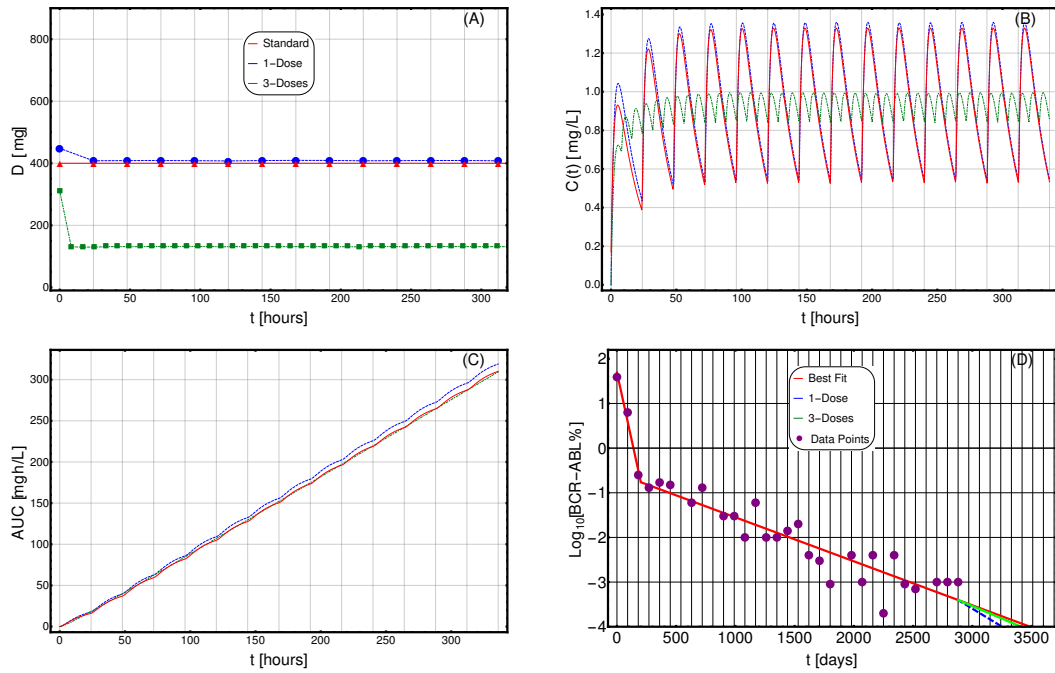

Figure S46: **Adjusting therapy for tumor burden minimization.** Imatinib administration optimized for tumor burden minimization in patient 0010 00001 HJ (male) from (Michor et al. (2005)), in the cases of: 1-dose/day (purple) and 3-doses/day (green), with  $\phi = 60$ , as compared to standard administration (red). In this case, the optimization is obtained on patient-specific PK and PD models. **(A)** Imatinib scheduled dosage in  $mg$  (y axis), displayed on 14 days (x axis). **(B)** Imatinib concentration in blood in  $[mg/L]$  (y axis). **(C)** Temporal variation of the AUC in  $[mg \cdot h/L]$  (y axis). **(D)** Longitudinal data points on tumor burden recorded are presented in purple. The best fit is shown with red lines. The slope of the right-most line is used to determine the cancer stem cell death rate and, in turn, the patient-specific PD parameters. The blue (green) line represents the predicted cancer subpopulation decay in case the 1-dose (3-doses) optimal administration

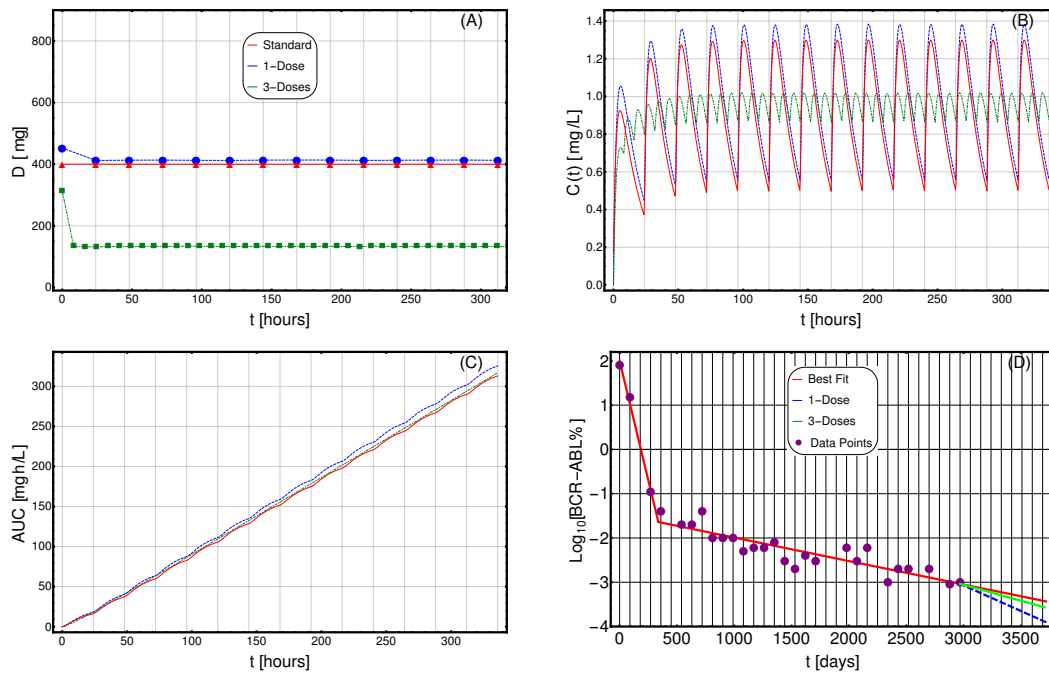

Figure S47: **Adjusting therapy for tumor burden minimization.** Imatinib administration optimized for tumor burden minimization in patient 0010 00002 GR (male) from (Michor et al. (2005)), in the cases of: 1-dose/day (purple) and 3-doses/day (green), with  $\phi = 60$ , as compared to standard administration (red). In this case, the optimization is obtained on patient-specific PK and PD models. **(A)** Imatinib scheduled dosage in  $mg$  (y axis), displayed on 14 days (x axis). **(B)** Imatinib concentration in blood in  $[mg/L]$  (y axis). **(C)** Temporal variation of the AUC in  $[mg \cdot h/L]$  (y axis). **(D)** Longitudinal data points on tumor burden recorded are presented in purple. The best fit is shown with red lines. The slope of the right-most line is used to determine the cancer stem cell death rate and, in turn, the patient-specific PD parameters. The blue (green) line represents the predicted cancer subpopulation decay in case the 1-dose (3-doses) optimal administration

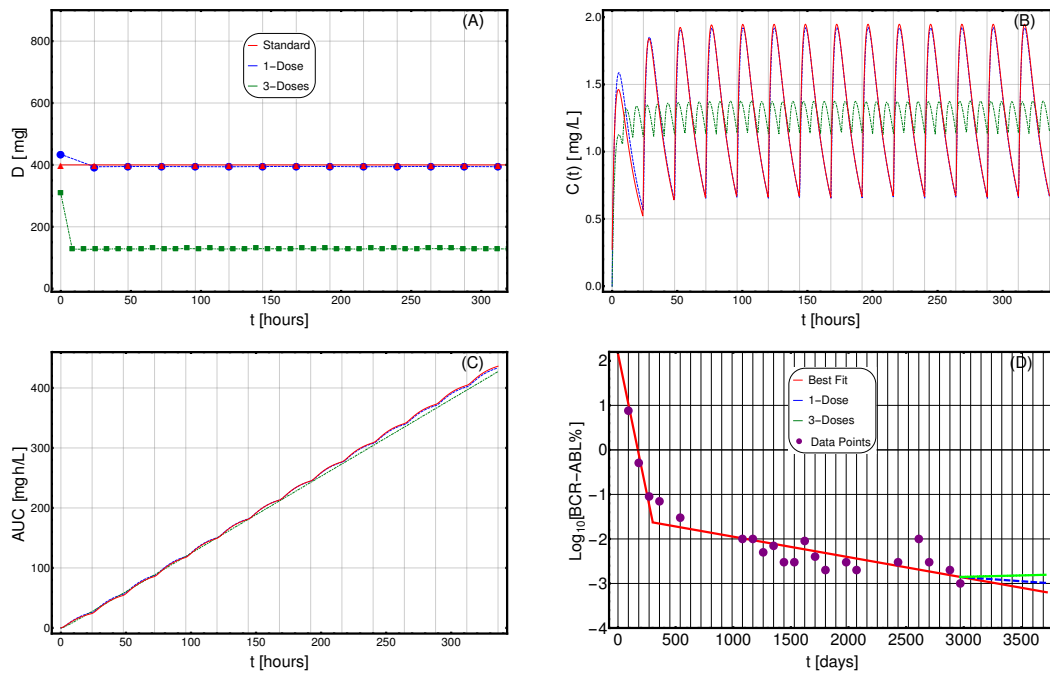

Figure S48: **Adjusting therapy for tumor burden minimization.** Imatinib administration optimized for tumor burden minimization in patient 0011 00001 CMC (female) from (Michor et al. (2005)), in the cases of: 1-dose/day (purple) and 3-doses/day (green), with  $\phi = 75$ , as compared to standard administration (red). In this case, the optimization is obtained on patient-specific PK and PD models. **(A)** Imatinib scheduled dosage in  $mg$  (y axis), displayed on 14 days (x axis). **(B)** Imatinib concentration in blood in  $[mg/L]$  (y axis). **(C)** Temporal variation of the AUC in  $[mg \cdot h/L]$  (y axis). **(D)** Longitudinal data points on tumor burden recorded are presented in purple. The best fit is shown with red lines. The slope of the right-most line is used to determine the cancer stem cell death rate and, in turn, the patient-specific PD parameters. The blue (green) line represents the predicted cancer subpopulation decay in case the 1-dose (3-doses) optimal administration



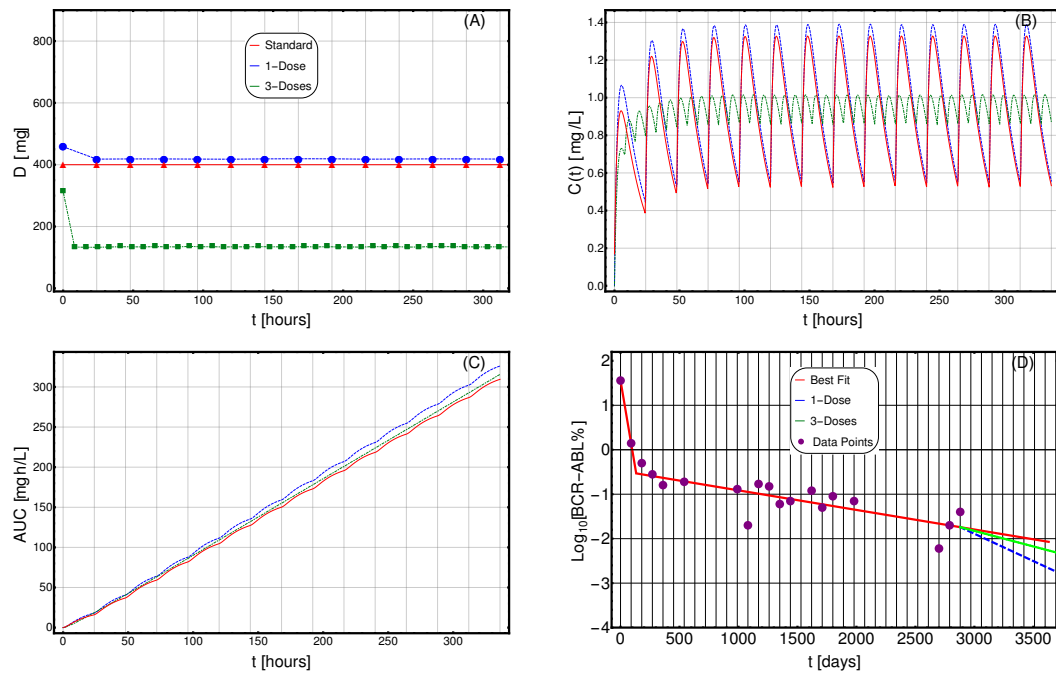

Figure S49: **Adjusting therapy for tumor burden minimization.** Imatinib administration optimized for tumor burden minimization in patient 0011 00005 SCW (male) from (Michor et al. (2005)), in the cases of: 1-dose/day (purple) and 3-doses/day (green), with  $\phi = 60$ , as compared to standard administration (red). In this case, the optimization is obtained on patient-specific PK and PD models. **(A)** Imatinib scheduled dosage in  $mg$  (y axis), displayed on 14 days (x axis). **(B)** Imatinib concentration in blood in  $[mg/L]$  (y axis). **(C)** Temporal variation of the AUC in  $[mg \cdot h/L]$  (y axis). **(D)** Longitudinal data points on tumor burden recorded are presented in purple. The best fit is shown with red lines. The slope of the right-most line is used to determine the cancer stem cell death rate and, in turn, the patient-specific PD parameters. The blue (green) line represents the predicted cancer subpopulation decay in case the 1-dose (3-doses) optimal administration

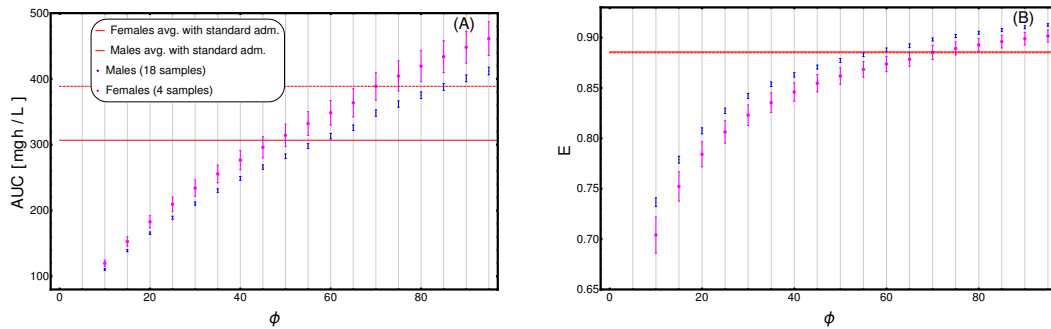

Figure S50: **Assessment of term weights in cost function definition (3-doses case).** The definition of the cost function for the adjusting treatment scenario requires to set the weights of the different terms. We here considered two terms, in order to: (i) minimize the tumor burden (weight  $W_1$ ), and (ii) minimize the AUC (weight  $W_2$ ) (see Materials and Methods for further details). We scanned the values of  $\phi = \frac{W_1}{W_2}$  in the range  $[10, 100]$ , by repeatedly applying CT4TD to the 22-patients CML dataset from (Michor et al. (2005)). **(A)** Distribution of the value of the AUC after 14-days of the optimized therapy retrieved by CT4TD (1-dose case), for distinct values of  $\phi$ , with respect to the 22 samples in the datasets, divided in males (blue) and females (pink), and compared to the average AUC values returned by standard administration (400 mg Imatinib/day) in males (red solid line) and females (red dashed line). **(B)** Distribution of efficiency computed via Eq. (9) on the time-average concentration over 14 days of the optimized therapy retrieved by CT4TD (3-doses case), for distinct values of  $\phi$ , and compared to the average efficiency in the standard administration scenario (solid and dashed red lines overlap).

---

### 3 TABLES

**Table S1.** Average parameters of PK model of Imatinib from (Widmer et al. (2006)).

| Parameters  | Value | Standard error | Units of measurement |
|-------------|-------|----------------|----------------------|
| $k_a$       | 0.61  | 30%            | $h^{-1}$             |
| $CL$        | 14.3  | 7.1%           | $Lh^{-1}$            |
| $v$         | 347   | 17.9%          | $L$                  |
| $\bar{B}W$  | 70    | Na             | $Kg$                 |
| $\bar{A}GE$ | 50    | Na             | $Years$              |

**Table S2.** Summary of the demographic population PK parameters for Imatinib from (Widmer et al. (2006)).

| Parameter  | Value |
|------------|-------|
| $k_a$      | 0.437 |
| $\theta_a$ | 12.8  |
| $\theta_b$ | 258   |
| $\theta_1$ | 12.7  |
| $\theta_2$ | 0.8   |
| $\theta_3$ | -2.1  |
| $\theta_4$ | 61.0  |

Table S3. Summary data analysis.

| Code           | $\alpha$ [days] <sup>-1</sup> | $\beta$ [days] <sup>-1</sup> | $T$ [days] | $R^2$    | Index |
|----------------|-------------------------------|------------------------------|------------|----------|-------|
| 0001 00002 RH  | -0.00793675                   | -0.000430922                 | 453        | 0.992329 | A     |
| 0001 00004 AJR | -0.0335431                    | -0.000455828                 | 112        | 0.99256  | B     |
| 0001 00006 GMC | -0.0080923                    | -0.000454651                 | 421        | 0.979851 | C     |
| 0001 00009 MJG | -0.0153962                    | -0.000432947                 | 218        | 0.985078 | D     |
| 0002 00003 SMV | -0.000734153                  | -0.000223423                 | 1710       | 0.992211 | E     |
| 0002 00007 PMG | -0.0124442                    | -0.000680913                 | 139        | 0.966844 | F     |
| 0002 00008 SAT | -0.0204914                    | -0.000527755                 | 121        | 0.987923 | G     |
| 0003 00002 CL  | -0.00158763                   | -0.000382959                 | 1260       | 0.969166 | H     |
| 0004 00003 CAR | -0.00249199                   | -0.00104476                  | 540        | 0.980976 | I     |
| 0004 00006 GM  | -0.0186312                    | -0.00105491                  | 105        | 0.987429 | J     |
| 0006 00006 ML  | -0.0154954                    | -0.00127265                  | 90         | 0.949279 | K     |
| 0006 00007 RJW | -0.01559                      | -0.000650637                 | 224        | 0.994058 | L     |
| 0007 00001 AJV | -0.0138184                    | -0.000720104                 | 211        | 0.987969 | M     |
| 0007 00002 DPS | -0.00937013                   | -0.000137684                 | 408        | 0.918741 | N     |
| 0008 00002 PWR | -0.0207251                    | -0.000485452                 | 140        | 0.985233 | O     |
| 0008 00003 LJG | -0.00583334                   | -0.000350359                 | 204        | 0.991091 | P     |
| 0008 00005 BAT | -0.00691467                   | -0.000350271                 | 431        | 0.987516 | Q     |
| 0009 00003 LH  | -0.0126738                    | -0.000620824                 | 202        | 0.994167 | R     |
| 0010 00001 HJ  | -0.0121572                    | -0.000984917                 | 202        | 0.977477 | S     |
| 0010 00002 GR  | -0.0107683                    | -0.000530116                 | 338        | 0.992    | T     |
| 0011 00001 CMC | -0.0125545                    | -0.000459044                 | 302        | 0.985232 | U     |
| 0011 00005 SCW | -0.0157079                    | -0.000440187                 | 133        | 0.948588 | V     |

Table S4. PK personal parameters. Weights are taken from (McDowell et al. (2005))

| Code           | Sex | Age [Years] | Weight [Kg] | $K_a$ | $CL$    | $V$ | $EC_{50}$ [mg/L] |
|----------------|-----|-------------|-------------|-------|---------|-----|------------------|
| 0001 00002 RH  | M   | 65          | 88.6        | 0.437 | 17.3446 | 319 | 0.121311         |
| 0001 00004 AJR | M   | 55          | 88.8        | 0.437 | 17.8009 | 319 | 0.118284         |
| 0001 00006 GMC | M   | 35          | 86.6        | 0.437 | 18.2417 | 319 | 0.11573          |
| 0001 00009 MJG | M   | 53          | 88.8        | 0.437 | 17.8849 | 319 | 0.118019         |
| 0002 00003 SMV | M   | 24          | 80.7        | 0.437 | 17.6333 | 319 | 0.121672         |
| 0002 00007 PMG | M   | 64          | 88.6        | 0.437 | 17.3866 | 319 | 0.118461         |
| 0002 00008 SAT | M   | 39          | 86.6        | 0.437 | 18.0737 | 319 | 0.115963         |
| 0003 00002 CL  | F   | 27          | 67.9        | 0.437 | 13.585  | 197 | 0.158738         |
| 0004 00003 CAR | F   | 23          | 67.9        | 0.437 | 13.753  | 197 | 0.148087         |
| 0004 00006 GM  | M   | 49          | 89.1        | 0.437 | 18.1073 | 319 | 0.110521         |
| 0006 00006 ML  | M   | 58          | 88.8        | 0.437 | 17.6749 | 319 | 0.110734         |
| 0006 00007 RJW | F   | 22          | 67.9        | 0.437 | 13.795  | 197 | 0.152898         |
| 0007 00001 AJV | M   | 50          | 88.8        | 0.437 | 18.0109 | 319 | 0.114397         |
| 0007 00002 DPS | M   | 22          | 80.7        | 0.437 | 17.7173 | 319 | 0.122035         |
| 0008 00002 PWR | M   | 55          | 88.8        | 0.437 | 17.8009 | 319 | 0.117983         |
| 0008 00003 LJG | M   | 55          | 88.8        | 0.437 | 17.8009 | 319 | 0.119356         |
| 0008 00005 BAT | M   | 59          | 88.8        | 0.437 | 17.6329 | 319 | 0.120372         |
| 0009 00003 LH  | M   | 65          | 88.6        | 0.437 | 17.3446 | 319 | 0.119339         |
| 0010 00001 HJ  | M   | 61          | 88.6        | 0.437 | 17.5126 | 319 | 0.114586         |
| 0010 00002 GR  | M   | 63          | 88.6        | 0.437 | 17.3446 | 319 | 0.12028          |
| 0011 00001 CMC | F   | 52          | 75.9        | 0.437 | 12.535  | 197 | 0.169956         |
| 0011 00005 SCW | M   | 26          | 80.7        | 0.437 | 17.5493 | 319 | 0.119957         |

---

**Table S5.** Results of study of robustness.  $a$  and  $b$  refer to parameter of the curve  $\Delta\mathcal{L}(\sigma_r)/\mathcal{L}_0 = a + b\sigma_r^2/r$  with  $r = k_a, CL, v$ . Plot of these curves are presented in fig. 2

| Parameter | $a$        | $b$     | $R^2$ |
|-----------|------------|---------|-------|
| $CL$      | -0.0051486 | 1.99948 | 0.997 |
| $v$       | -4.81123   | 212.498 | 0.997 |
| $k_a$     | -0.0179207 | 2.7182  | 0.998 |

Table S6. Configuration of RedCRAB

| N. of SI | Basis   | N. of basis in the 1 <sup>th</sup> I. | N. of basis in the others I.s | N. of time points |
|----------|---------|---------------------------------------|-------------------------------|-------------------|
| 50       | Fourier | 120                                   | 100                           | 1001              |



---

## REFERENCES

- Castiglione, F. and Piccoli, B. (2007). Cancer immunotherapy, mathematical modeling and optimal control. *Journal of theoretical Biology* 247, 723–732
- McDowell, A. M., Fryar, C., Hirsch, R., and Ogden, C. (2005). Anthropometric reference data for children and adults: U.S. population, 1999-2002. *Advance data* 361, 1–5
- Michor, F., Hughes, T. P., Iwasa, Y., Branford, S., Shah, N. P., Sawyers, C. L., et al. (2005). Dynamics of chronic myeloid leukaemia. *Nature* 435, 1267
- Widmer, N., Decosterd, L., Csajka, C., Leyvraz, S., Duchosal, M., Rosselet, A., et al. (2006). Population pharmacokinetics of imatinib and the role of  $\alpha$ 1-acid glycoprotein. *British journal of clinical pharmacology* 62, 97–112
